# Supplementary material for: Dynamic modulation of inequality aversion in human interpersonal negotiations
Source: Springer Nature journal article supplement (doi:10.1038/s42003-022-03318-8), 2022-04-14
Supplement: MOESM3 [file 42003_2022_3318_MOESM3_ESM.pdf]

## Description of Additional Supplementary Files

**File name:** Supplementary Data 1

**Description:** Source data underlying the graphs in the manuscript.
