# Supplementary material for: Dynamic modulation of inequality aversion in human interpersonal negotiations
Source: Commun Biol. 2022 Apr 14;5:359. doi: 10.1038/s42003-022-03318-8 (PMC9010408; doi:10.1038/s42003-022-03318-8)
Supplement: Supplementary file 4 — Supplementary Data 1 [file 42003_2022_3318_MOESM4_ESM.xlsx]

## Sheet: Fig_2A_parameters
delta	gamma
1.02	0.66
0.69	0.39
1.04	0.4
0.82	0.51
0.87	0.62
0.8	0.39
0.97	0.66
0.53	0.58
0.77	0.43
0.55	0.38
1.03	1.09
0.93	0.73
1.03	0.73
0.9	0.62
1.04	0.98
0.88	0.92
1.03	1.05
1.13	0.73
0.88	0.43
0.63	0.69
0.88	0.66
0.94	0.6
0.89	0.65
1.17	0.67
0.87	0.46
1.21	1.07
1.04	0.8
1.21	0.77
1.33	0.65
0.96	0.98
0.75	0.42
0.53	0.69
1.03	1.09
2.28	1.43
0.65	0.52
1.28	1.04
0.97	0.7
1.2	0.57
0.88	0.86
0.73	0.43
0.75	0.52
0.83	0.36
0.94	0.9
0.91	1

## Sheet: Figure_2B_coefs
-0.0177389	0.00956987
-0.0470714	0.0236855
0.0160086	0.110936
0.0515315	-0.0101997
-0.0171965	-0.0267724
0.0410202	0.037677
-0.0239288	0.00793788
errors
0.103836	0.083695
0.0989515	0.0797583
0.176177	0.142005
0.176504	0.142269
0.104441	0.0841831
0.0934877	0.0753543
0.094036	0.0757963

## Sheet: Figure_3A
0.0185185	0.0851064	0.0833333	0.204301	0.24	0.486111	0.511628	0.633333	0.736842	0.9375	1	0.5	0.5	0.5	0.470588	0.157895	0.4	0.25	0.142857
0.024	0.0555556	0.191489	0.154639	0.157407	0.328571	0.456522	0.448276	0.769231	0.857143	0.866667	0.75	0.7	0.294118	0.448276	0.5	0.24	0.315789	0.0714286
0.0894309	0.0833333	0.157895	0.22	0.213333	0.434783	0.372549	0.564103	0.722222	0.647059	0.875	0.8	0.6	0.3125	0.266667	0.458333	0.208333	0.3125	0.0666667
0.0192308	0.08	0.0487805	0.208333	0.116279	0.36	0.179104	0.487805	0.636364	0.928571	0.769231	0.384615	0.761905	0.555556	0.5	0.25	0.423077	0.176471	0.210526
0.016129	0.0547945	0.104651	0.185185	0.262295	0.439024	0.404878	0.716312	0.861789	0.964088	0.932432	0.953125	0.886076	0.780488	0.575758	0.626667	0.727273	0.625	0.705882
0.101449	0.1	0.177083	0.181034	0.298387	0.552846	0.50365	0.645669	0.906542	0.951456	0.946903	0.924528	0.933333	0.9	0.867347	0.868132	0.855072	0.882353	0.71831
0.0188679	0.173913	0.222222	0.32	0.28972	0.482759	0.548077	0.754237	0.924242	0.971831	0.948718	0.945455	0.866667	0.854839	0.818182	0.858824	0.835821	0.8	0.8
0.233871	0.318182	0.384615	0.428571	0.477612	0.630435	0.67033	0.776119	0.931507	0.971831	0.973684	0.964706	0.975	0.948276	0.878378	0.904762	0.777778	0.846154	0.95
0.415493	0.488372	0.522727	0.5625	0.533333	0.555556	0.708333	0.868421	0.969697	0.894737	0.952381	0.934783	0.954545	0.97561	0.975	0.896552	1	1	1

## Sheet: Figure_3B
coefficients
0.145188
0.152416
0.0636291
95% CI
0.111199	0.179177
0.118427	0.186405
0.0296399	0.0976183

## Sheet: Figure_4
0.292654	1.10361	0.0696257	-0.170873	-0.139369	-0.0812772	0.0500988	-0.0994687	0.149898	0.1776	-0.102815	-0.0900309
0.305883	2.45034	0.536655	-0.47277	-0.142249	-0.19219	-0.189673	-0.146612	0.102841	0.123492	0.117189	-0.388349
-0.0905267	0.73552	-0.0910685	-0.0229724	-0.27666	0.201301	-0.260308	0.13377	-0.0205766	0.171302	-0.2037	0.131185
-0.201196	0.137625	0.0377964	0.0754671	-0.237613	-0.152961	0.138031	0.0227324	0.20382	0.316307	-0.0759287	0.26728
0.23795	0.44609	-0.042326	0.131105	0.232781	0.552251	0.249948	-0.109537	0.0348462	0.0447005	0.2044	-0.175826
0.220694	1.60882	0.250838	-0.485654	0.0188018	0.96494	0.144361	-0.602544	-0.0376981	-0.186388	-0.119514	-0.198283
-0.023605	2.08744	0.607642	-0.399216	0.198042	-0.382424	0.240503	0.222307	0.265701	0.0242526	0.216997	0.0928205
-0.022025	0.696939	-0.197071	-0.10234	0.0110009	0.402971	-0.301492	-0.000510612	0.100686	-0.1425	0.445204	-0.0906046
-0.0690356	0.880694	0.277897	-0.0271491	0.10855	-0.106687	0.0252172	0.0200554	-0.139575	-0.18324	0.00511442	0.0507933
0.251287	0.641753	0.0347762	0.129505	0.104262	-0.151901	-0.0287599	-0.182062	-0.0462528	-0.230229	0.0766577	-0.0236427
0.0659494	-0.0420482	0.0469287	0.271512	0.143959	0.403814	-0.0849137	0.0835438	-0.0728126	-0.0236956	0.22799	-0.0730815
0.0617449	1.62656	0.464892	-0.47961	0.425025	0.285901	-0.0322645	-0.224517	-0.206568	0.425816	0.115678	-0.48152
0.00817393	-0.180263	0.021934	0.0802654	0.0526253	0.0810035	-0.053711	-0.164334	0.0823556	0.0914768	-0.00108908	-0.079366
-0.0724788	0.926294	-0.00866115	-0.183755	0.203469	0.70983	0.180484	-0.105791	0.0039065	-0.408259	-0.140775	0.0629365
0.0223061	0.5328	0.15817	0.0333683	-0.0140544	-0.263917	0.0425081	0.0886553	-0.0044839	0.0556171	-0.0695073	-0.0473775
0.0671782	1.66386	0.192923	-0.303661	-0.137036	-0.0649186	-0.147966	-0.138861	-0.125177	0.0420841	0.125671	0.125445
-0.114273	0.31228	-0.0450761	0.104572	0.146942	0.00196656	-0.0746981	0.112912	0.0641205	0.16038	0.075439	-0.0640493
0.140641	0.943686	0.115939	0.121206	0.0872797	-0.546797	0.0646405	0.215764	0.014996	-0.0719179	0.00409157	-0.0268488
0.0618949	1.92936	0.176686	-0.435185	0.0668913	-0.448181	-0.0961192	0.0529358	0.131366	0.859791	0.159928	-0.310153
-0.103146	0.0791765	-0.139669	0.273783	0.0978727	-0.0213501	0.103162	0.235948	-0.0403906	0.103319	0.0502038	-0.162161
-0.00223374	0.461077	-0.15841	0.202628	-0.0612021	-0.369603	-0.0321678	-0.0638258	0.104048	0.0291887	0.0452093	-0.0682751
0.0451457	1.28172	0.427296	-0.0974938	-0.195552	-0.253236	-0.369935	0.0418531	-0.0355966	0.298467	0.0700398	0.0203531
0.143591	1.73943	0.271962	-0.395741	0.0272036	-0.631922	-0.120486	0.136864	0.288077	0.219686	0.364592	-0.0570949
0.399464	1.00715	0.485544	-0.0887088	0.130174	-0.0415377	-0.0176873	-0.371925	0.158161	-0.112106	0.175636	-0.191267
0.0515596	0.183182	0.260793	0.109484	0.154338	0.274103	0.0916755	-0.140378	0.0344647	-0.00345829	0.0619474	-0.0268501
-0.156253	0.753263	0.233336	-0.0162293	-0.0546299	0.260112	-0.135504	0.00625949	-0.101112	0.132119	0.0466406	0.152264
-0.212429	0.294163	-0.265892	0.292814	-0.240798	-0.156414	-0.0239016	0.0902582	0.192728	-0.0861335	-0.0327399	0.247332
-0.10457	0.6447	-0.106968	-0.126553	0.135345	0.143724	0.169897	0.00321514	0.00913828	-0.317014	0.12896	0.136955
0.201903	2.01707	0.2355	-0.562665	0.452369	-0.031665	0.141477	-0.186441	-0.294362	-0.042694	-0.155655	-0.406454
-0.255671	0.778047	0.287337	0.00107823	0.166044	0.382599	-0.140337	-0.218674	-0.146548	0.246731	0.0141606	-0.0199471
0.528856	1.13893	0.39899	-0.18289	-0.0361309	0.548148	0.0603572	-0.312331	0.394118	-0.807448	0.415673	0.284921
0.260958	2.32909	0.306618	-0.654047	-0.104726	0.0832396	-0.0166079	-0.280397	0.0793084	-0.698563	-0.0889298	0.301578
0.274273	1.6494	0.373217	-0.254328	0.248687	0.211644	0.289803	-0.182314	0.173465	-0.187205	-0.106192	-0.102821
-0.00322646	0.347963	-0.0787668	-0.132473	0.0985892	0.127341	0.0264815	-0.167508	-0.123735	-0.168626	-0.0163819	0.124299
-0.0467705	1.5855	0.377841	-0.400417	0.145085	0.13949	-0.0259137	-0.239908	0.105289	-0.109652	0.150115	-0.0740122
0.478115	1.42102	0.316336	-0.460394	-0.123354	0.140895	0.277217	-0.370771	0.0623571	-0.0939059	-0.0156718	-0.124305
0.508626	0.880552	0.416369	-0.0737601	0.318365	0.615011	0.207968	-0.173453	-0.146988	-0.0415339	0.0941665	-0.339663
0.296212	1.08513	0.277771	-0.0107521	0.0101153	0.184263	-0.0477174	0.0405264	0.149057	-0.565817	0.13302	0.108826
0.173169	0.992943	0.0618746	-0.0527928	0.156305	-0.138994	-0.0322648	0.0469708	-0.142008	-0.107307	-0.0775668	-0.180961
-0.295165	0.356595	-0.0184935	0.36073	-0.128536	-0.131542	0.0867951	0.279275	0.172468	0.154788	-0.269989	0.19658
0.573092	1.86191	0.320394	-0.559983	0.171372	0.203866	0.0318582	-0.410221	0.0154168	-0.34539	0.25074	-0.0950772
-0.0234142	0.481691	0.159106	-0.0184257	0.118262	0.430463	-0.17336	-0.0083909	0.0970846	0.115731	0.0814223	-0.144972
0.0139628	0.837873	-0.10111	-0.105518	-0.100077	-0.498325	-0.0836862	-0.0482508	-0.153628	0.188379	-0.146847	0.0712429
0.12089	0.0654148	0.137333	0.0257497	0.18455	0.160186	0.106162	-0.095591	0.0408696	0.189067	-0.0372623	-0.179596
0.0911399	0.972145	0.161064	-0.11507	0.0550527	0.0646186	0.00543569	-0.072972	0.0316608	-0.0173361	0.0499164	-0.041995	means
0.0319812	0.101688	0.0322923	0.0389445	0.0252739	0.0520549	0.0226748	0.028266	0.0212841	0.0434638	0.0234522	0.0277061	errors

## Sheet: Figure_5
kappa	omega	beta
-0.110076	0.0114101	0.00148968		coefficients
0.17993	-0.0802901	0.00219295
0.00108688	-0.0679037	0.0234828
-0.136549	0.0920864	-0.0256172
0.143114	-0.0270717	-0.00551611
0.0604494	0.00709584	-0.00109432
-0.0700564	-0.0852422	0.00471258
0.207288	0.0881465	0.0152556		errors
0.197538	0.0840004	0.0145381
0.351705	0.149558	0.0258842
0.352358	0.149835	0.0259322
0.208497	0.0886606	0.0153446
0.186631	0.0793622	0.0137353
0.187726	0.0798277	0.0138159

## Sheet: Figure_6A
6A self rewards, rows are participants, means and SEM last 2 rows
-0.111964	-0.111945	-0.111938	-0.111931	-0.111917	-0.111891	-0.111854	-0.11182	-0.111786	-0.111745	-0.1117	-0.111653	-0.111589	-0.111508	-0.111418	-0.111314	-0.111207	-0.111098	-0.110986	-0.110876	-0.110776	-0.110676	-0.110571	-0.110465	-0.110361	-0.110255	-0.110148	-0.110045	-0.109953	-0.109876	-0.109795	-0.109703	-0.109605	-0.1095	-0.10939	-0.109277	-0.109172	-0.109078	-0.10899	-0.108893	-0.108789	-0.108693	-0.108604	-0.108515	-0.108419	-0.108318	-0.108224	-0.108127	-0.108021	-0.107918
-0.0776361	-0.0775116	-0.0773806	-0.0772311	-0.0770794	-0.076949	-0.0768336	-0.07672	-0.0766146	-0.0765268	-0.0764516	-0.0763186	-0.0760129	-0.0756169	-0.0752536	-0.0749151	-0.0746168	-0.0744595	-0.0744	-0.0743279	-0.0742748	-0.074254	-0.074246	-0.0741089	-0.0738567	-0.0737298	-0.0737206	-0.0737062	-0.0736805	-0.0736469	-0.073634	-0.0736425	-0.0736452	-0.0737171	-0.0738859	-0.07407	-0.0742495	-0.0744409	-0.0746436	-0.0748631	-0.075062	-0.0752414	-0.0754357	-0.0756214	-0.0757934	-0.075959	-0.0761374	-0.0763271	-0.0764954	-0.076654
-0.0260366	-0.0259623	-0.0258634	-0.025742	-0.0256586	-0.0256213	-0.0255807	-0.0255293	-0.0254745	-0.0254227	-0.0253753	-0.0253317	-0.0252894	-0.0252498	-0.0252153	-0.0251918	-0.0251778	-0.0251648	-0.0251499	-0.0251322	-0.0251174	-0.0251094	-0.0251069	-0.0251042	-0.0250975	-0.0250845	-0.025066	-0.0250443	-0.0250202	-0.0249942	-0.0249649	-0.0249353	-0.0249076	-0.0248771	-0.0248416	-0.0247878	-0.0246969	-0.0245851	-0.0244977	-0.0244406	-0.0243748	-0.0243056	-0.0242463	-0.0241863	-0.0241285	-0.0241258	-0.0241715	-0.0242136	-0.0242062	-0.0241484
0.0443447	0.0447492	0.045082	0.0453589	0.0456228	0.0458831	0.0461449	0.0463618	0.0465455	0.0467483	0.0469516	0.0471656	0.0474073	0.0476628	0.0479096	0.048139	0.0483656	0.048603	0.0488442	0.0490794	0.0493265	0.0495947	0.0498722	0.050129	0.0503605	0.0506	0.0508631	0.0511545	0.0514391	0.0517077	0.0519651	0.0521944	0.0524069	0.0526251	0.052863	0.053122	0.0533805	0.053694	0.054067	0.0544403	0.0548572	0.0553076	0.0557751	0.0562605	0.056729	0.0571407	0.0575228	0.0579383	0.0583445	0.0587493
-0.0198077	-0.0198217	-0.019858	-0.0198895	-0.0199212	-0.0199641	-0.0200166	-0.0200972	-0.0202036	-0.0203126	-0.0204249	-0.0205481	-0.0206869	-0.0208414	-0.021001	-0.0211588	-0.021277	-0.0213619	-0.0214897	-0.0216565	-0.021826	-0.0220064	-0.0221983	-0.0223438	-0.0224427	-0.0225312	-0.0226172	-0.0227095	-0.0228138	-0.0229273	-0.0230507	-0.0232121	-0.0234092	-0.0236071	-0.0237785	-0.0239584	-0.0241675	-0.0243697	-0.0245583	-0.0247473	-0.0249503	-0.0251659	-0.0253863	-0.0256079	-0.0258229	-0.0260338	-0.0262466	-0.0264664	-0.0267007	-0.0269341
-0.113376	-0.113588	-0.113795	-0.114009	-0.114181	-0.114272	-0.1143	-0.114278	-0.114308	-0.114357	-0.114429	-0.11453	-0.114534	-0.114549	-0.114596	-0.114655	-0.114696	-0.11466	-0.114686	-0.114774	-0.114842	-0.114865	-0.114847	-0.114885	-0.114932	-0.114883	-0.11482	-0.114764	-0.114673	-0.114623	-0.114515	-0.114366	-0.114269	-0.114132	-0.113988	-0.113866	-0.113741	-0.113507	-0.11329	-0.113208	-0.11316	-0.113077	-0.11293	-0.112756	-0.11258	-0.112415	-0.112239	-0.112045	-0.111759	-0.1114
-0.0256792	-0.025802	-0.0259068	-0.0259301	-0.0258483	-0.0257572	-0.025683	-0.0256564	-0.0256455	-0.0256759	-0.0257741	-0.025961	-0.0261786	-0.0263767	-0.0265853	-0.02677	-0.0270157	-0.0273233	-0.0275439	-0.0276373	-0.0277002	-0.0277962	-0.0280068	-0.0282876	-0.0285487	-0.0288149	-0.0290219	-0.029199	-0.02943	-0.0296738	-0.0298786	-0.0300616	-0.0302554	-0.0304822	-0.0307531	-0.0310498	-0.0313382	-0.0316076	-0.0318758	-0.0320916	-0.0322717	-0.032516	-0.0328143	-0.0331215	-0.0334319	-0.0337317	-0.0340215	-0.0343527	-0.0346504	-0.0349646
-0.184921	-0.184981	-0.185052	-0.185134	-0.185209	-0.185254	-0.185257	-0.185239	-0.185002	-0.184545	-0.184085	-0.183621	-0.183165	-0.182722	-0.182303	-0.181895	-0.181451	-0.180992	-0.18055	-0.180134	-0.179755	-0.17931	-0.178805	-0.178388	-0.177885	-0.177226	-0.176567	-0.175929	-0.175466	-0.175165	-0.174882	-0.174478	-0.173976	-0.173539	-0.173125	-0.172723	-0.172264	-0.171824	-0.17142	-0.170887	-0.170265	-0.169646	-0.168925	-0.168104	-0.167334	-0.166626	-0.165964	-0.165318	-0.164671	-0.164
0.0329324	0.0329239	0.032901	0.0330554	0.03326	0.032989	0.0320097	0.0309633	0.0302552	0.0300191	0.0302025	0.0307333	0.0312857	0.0317034	0.0323099	0.0328689	0.0333808	0.0338572	0.0344703	0.0349211	0.0350444	0.0354418	0.0362526	0.0370338	0.037629	0.038218	0.0390479	0.0400688	0.0410296	0.0419365	0.042925	0.0440419	0.0450464	0.0458764	0.0466392	0.0473516	0.048062	0.0481599	0.047563	0.046908	0.0462609	0.0456063	0.044948	0.0443103	0.0436842	0.0430381	0.0423788	0.0417266	0.0410856	0.040416
0.0617217	0.0619148	0.0621262	0.0623475	0.0625814	0.0629014	0.0633054	0.0637077	0.0641113	0.0644711	0.0648399	0.0652622	0.0656277	0.0659573	0.0662792	0.0669168	0.0678994	0.0688025	0.0696522	0.0708676	0.0724821	0.0738649	0.0748849	0.0758634	0.076836	0.077753	0.078614	0.0795374	0.0806427	0.0818026	0.0828889	0.0839081	0.0849395	0.0861751	0.0875526	0.0888916	0.0901453	0.0913139	0.0923539	0.0932671	0.0941567	0.0950265	0.0959314	0.0968813	0.0980906	0.0995006	0.100959	0.102453	0.103854	0.105245
-0.125607	-0.124745	-0.124028	-0.123504	-0.122947	-0.121994	-0.120798	-0.11991	-0.119217	-0.118717	-0.118402	-0.118107	-0.11765	-0.11681	-0.115958	-0.115324	-0.114752	-0.114256	-0.113889	-0.113612	-0.113342	-0.112968	-0.112542	-0.11218	-0.111934	-0.111866	-0.1118	-0.111533	-0.111142	-0.110845	-0.110651	-0.11062	-0.110798	-0.110974	-0.111048	-0.11108	-0.110949	-0.110733	-0.110605	-0.110492	-0.11031	-0.110149	-0.110085	-0.110066	-0.110097	-0.110072	-0.110108	-0.110241	-0.110339	-0.110431
0.0576946	0.057537	0.0573612	0.0571903	0.0570305	0.0568788	0.0567159	0.0565411	0.0563698	0.0562026	0.0560477	0.0559167	0.055796	0.0556752	0.0555609	0.0554715	0.0553854	0.0552779	0.0551702	0.0550535	0.0549225	0.0547921	0.054653	0.0545056	0.0543759	0.0542558	0.0541225	0.0539759	0.0538212	0.0536562	0.0534816	0.0533047	0.053131	0.0529548	0.0527737	0.052592	0.052411	0.052222	0.0520283	0.0518358	0.0516348	0.0514272	0.0512112	0.0509777	0.0507306	0.0504783	0.0502261	0.0499697	0.0497106	0.0494555
0.0164267	0.0168514	0.0175191	0.0181489	0.018471	0.0185066	0.0185405	0.0185625	0.0185695	0.0185649	0.0190258	0.0199349	0.0205151	0.0210451	0.021544	0.022023	0.0227494	0.0231627	0.023278	0.0236576	0.0242861	0.0246075	0.0246409	0.0246716	0.0246478	0.0245743	0.0244988	0.0244094	0.0243464	0.0241264	0.0239666	0.0240563	0.0241478	0.0242509	0.0243589	0.0242712	0.023993	0.023672	0.0233145	0.0231492	0.0231742	0.023207	0.0231956	0.0232275	0.0230805	0.0226755	0.022285	0.0218992	0.0215212	0.0211591
0.010175	0.010196	0.0102356	0.0102813	0.0103124	0.010337	0.0103824	0.0104392	0.010498	0.0105655	0.0106412	0.0106903	0.0107098	0.0107337	0.0107659	0.0107986	0.0108257	0.0108648	0.0109287	0.0110174	0.0111207	0.0112393	0.0113771	0.0114998	0.0115926	0.0116872	0.0117948	0.0119206	0.0120605	0.0122004	0.0123486	0.012513	0.0126941	0.0128917	0.0130422	0.0131514	0.013269	0.0133944	0.0135542	0.0137293	0.0139499	0.014226	0.0145206	0.0148204	0.0150573	0.0152341	0.0154192	0.0156631	0.0159454	0.016173
0.0372034	0.0372337	0.0372756	0.0373647	0.0374282	0.0374224	0.0373837	0.0373303	0.0372997	0.0372902	0.0372587	0.0372006	0.0371424	0.0371126	0.0371634	0.0373136	0.037454	0.0375224	0.0375725	0.0376245	0.0376837	0.0377262	0.0377498	0.0377938	0.0378416	0.0379033	0.0379866	0.0380142	0.0379759	0.0379677	0.0379918	0.0379855	0.0379642	0.037945	0.0379085	0.0378785	0.0378534	0.0377909	0.0377198	0.0376617	0.0375758	0.0374147	0.0372378	0.0370989	0.0369519	0.0367899	0.036642	0.0364479	0.0361805	0.0359213
0.0183816	0.0184058	0.0184294	0.0184607	0.0184914	0.0185221	0.0184987	0.0184154	0.0183415	0.0182672	0.018155	0.0180042	0.01785	0.017722	0.0176047	0.0175228	0.0174856	0.0175005	0.0175663	0.0175858	0.0175486	0.0175033	0.0174603	0.0174208	0.0173862	0.0173712	0.0173608	0.0173745	0.0174081	0.0173536	0.0172143	0.0170623	0.0169052	0.0167852	0.0167135	0.0166606	0.0166217	0.0165935	0.0165755	0.0165729	0.0165729	0.0165523	0.0165213	0.0165052	0.0164822	0.0164188	0.0162885	0.0161084	0.0159338	0.0157769
0.0259244	0.0260374	0.0261019	0.0261434	0.0262213	0.0263162	0.0264185	0.0265329	0.0266411	0.0267341	0.0268171	0.0269342	0.0271107	0.027325	0.0275799	0.0278752	0.0282062	0.0285074	0.0287682	0.0291079	0.029518	0.0299144	0.0303237	0.0307742	0.0312387	0.0317213	0.0322133	0.0326888	0.0331529	0.0336171	0.0340103	0.0343605	0.0347493	0.0351485	0.0355608	0.0360271	0.0365674	0.037166	0.0378121	0.0385162	0.0392427	0.0399477	0.0406088	0.0412305	0.0418204	0.0424036	0.0430032	0.043578	0.0441275	0.0446766
-0.00936128	-0.00914859	-0.00893624	-0.00871548	-0.00851825	-0.00840555	-0.00834683	-0.00819801	-0.00793874	-0.00780412	-0.00786162	-0.00794893	-0.00799148	-0.00798356	-0.00798199	-0.00800852	-0.00803602	-0.00803845	-0.00796383	-0.00787999	-0.00781955	-0.00771579	-0.00757114	-0.00747256	-0.00738862	-0.00720517	-0.00700589	-0.00684692	-0.00670105	-0.00657813	-0.00644655	-0.00636597	-0.00654208	-0.00690446	-0.00726282	-0.00760357	-0.00791946	-0.00819852	-0.00845525	-0.00871396	-0.00890523	-0.00900434	-0.009081	-0.0090863	-0.00874414	-0.00814295	-0.00764772	-0.00750972	-0.00736151	-0.00699387
-0.0405006	-0.0403411	-0.0401609	-0.0399677	-0.0397777	-0.0396025	-0.0394382	-0.0392661	-0.0390837	-0.0388971	-0.0387099	-0.0385175	-0.038331	-0.03817	-0.0380156	-0.0378514	-0.0376893	-0.0375386	-0.0373945	-0.0372344	-0.0370551	-0.0368764	-0.0366845	-0.0364659	-0.0362343	-0.0359913	-0.0357448	-0.0354941	-0.0352355	-0.034972	-0.0346993	-0.0345475	-0.0345266	-0.034509	-0.0344819	-0.0344451	-0.0344072	-0.0343741	-0.0343352	-0.0342884	-0.0342574	-0.0342302	-0.0341795	-0.0341082	-0.0340211	-0.0339305	-0.0338549	-0.0337685	-0.0336542	-0.0335401
-0.0383594	-0.0380627	-0.0377701	-0.0375085	-0.0372667	-0.0370032	-0.0367326	-0.0364901	-0.036259	-0.0360264	-0.0358079	-0.0356098	-0.0354192	-0.0352455	-0.0351167	-0.0350258	-0.034951	-0.0349021	-0.034861	-0.0347979	-0.0347286	-0.0346111	-0.0344746	-0.0343853	-0.0343216	-0.0342704	-0.0342393	-0.0342602	-0.0343181	-0.034372	-0.0344157	-0.0344505	-0.0344908	-0.0345345	-0.0345518	-0.0345606	-0.0345742	-0.0346317	-0.0347389	-0.0348511	-0.0349664	-0.0350776	-0.0351743	-0.0352591	-0.0353459	-0.0354432	-0.0355749	-0.035728	-0.0358712	-0.0360129
-0.00720999	-0.00737361	-0.00777408	-0.00820219	-0.00857625	-0.00889716	-0.00916293	-0.0093768	-0.0094283	-0.00921037	-0.00873924	-0.00847541	-0.00852667	-0.00843915	-0.00810655	-0.00755566	-0.00723993	-0.00727659	-0.00733178	-0.00738657	-0.00744088	-0.00752084	-0.00728406	-0.00684724	-0.00669477	-0.00681394	-0.00708105	-0.00725003	-0.00719263	-0.00692134	-0.00690292	-0.00689384	-0.00656461	-0.00628743	-0.00640704	-0.00691632	-0.00736717	-0.0076677	-0.00782576	-0.00806874	-0.00843633	-0.00871874	-0.0089151	-0.00917368	-0.0095113	-0.00968499	-0.00958795	-0.00928264	-0.00921814	-0.0094841
0.0773046	0.0775833	0.0778734	0.0779675	0.0778725	0.0777882	0.0777067	0.0776368	0.0775814	0.0775515	0.0775499	0.0775857	0.0776596	0.077766	0.0779076	0.0780635	0.0781466	0.0781678	0.0782016	0.0782376	0.078266	0.0782957	0.0783301	0.0783451	0.0783313	0.0783092	0.0783024	0.0783116	0.078333	0.0783643	0.0783926	0.0782542	0.07797	0.0777015	0.0774388	0.0771993	0.0769881	0.0768132	0.0766625	0.0765165	0.0763938	0.0762971	0.0762174	0.0761583	0.0761078	0.076037	0.0759542	0.0758791	0.0758109	0.0757439
0.10192	0.101679	0.101436	0.101186	0.100846	0.10041	0.0999495	0.0994711	0.0990091	0.0985703	0.0980996	0.0975793	0.0970447	0.0964977	0.095962	0.0954343	0.0948937	0.0943842	0.0938932	0.0934253	0.0930245	0.0926597	0.0922997	0.0919218	0.0915268	0.0911295	0.090714	0.0902267	0.0895995	0.0888775	0.0881631	0.0874315	0.0866728	0.0859166	0.0851608	0.0844132	0.0836579	0.0828811	0.0820881	0.08127	0.0804515	0.079647	0.078843	0.0780383	0.0772223	0.0763749	0.0755538	0.0747728	0.0739708	0.0732119
0.0312933	0.0315683	0.0318439	0.0321041	0.0323495	0.0325896	0.0328186	0.0330548	0.0333052	0.0335557	0.0337964	0.0340493	0.0342928	0.0345013	0.0347197	0.03498	0.035256	0.0355434	0.0358188	0.0360404	0.0362273	0.0363895	0.0365526	0.0367469	0.036942	0.0371401	0.0373604	0.0375867	0.0378038	0.0380628	0.0383517	0.0386354	0.0389265	0.0391888	0.0394282	0.0396231	0.0397672	0.0399471	0.0401748	0.0403541	0.0404752	0.0405785	0.0406738	0.0407529	0.0407868	0.0407959	0.0407914	0.0407752	0.0407701	0.040781
-0.00113436	-0.00116072	-0.0011902	-0.00120304	-0.00121772	-0.00125218	-0.00129494	-0.00133148	-0.00136186	-0.00138795	-0.00140833	-0.0014249	-0.00144007	-0.00145334	-0.00146749	-0.00148723	-0.00150862	-0.00152662	-0.00154156	-0.00155669	-0.0015739	-0.00159169	-0.00160826	-0.00162545	-0.00164823	-0.00167586	-0.00170458	-0.00173416	-0.00176491	-0.00179453	-0.00182296	-0.00185071	-0.00187704	-0.00190277	-0.00192699	-0.00194947	-0.00197119	-0.00199073	-0.00200766	-0.00202432	-0.00204077	-0.00205656	-0.0020723	-0.00208883	-0.00210608	-0.00212143	-0.0021346	-0.00214879	-0.00216409	-0.00217724
-0.0334708	-0.0336422	-0.0338077	-0.0339759	-0.034125	-0.0342607	-0.0343793	-0.0344605	-0.0345115	-0.0345431	-0.0345831	-0.0345939	-0.0345418	-0.0344823	-0.0344437	-0.0344037	-0.0343444	-0.0342997	-0.0343617	-0.0344968	-0.0346179	-0.0347626	-0.0349123	-0.0350215	-0.0351148	-0.0352004	-0.0352829	-0.0353561	-0.0353541	-0.0352766	-0.0351922	-0.0350932	-0.0349803	-0.0348798	-0.03479	-0.0347144	-0.0346859	-0.0346809	-0.034676	-0.034675	-0.0346632	-0.0346454	-0.0346223	-0.0344635	-0.0341665	-0.0338648	-0.03357	-0.0333013	-0.0330343	-0.0327251
0.144289	0.144993	0.14577	0.146494	0.147078	0.147456	0.147689	0.148245	0.149142	0.150005	0.150792	0.151559	0.152338	0.153123	0.153896	0.154647	0.155605	0.156774	0.157964	0.15922	0.160373	0.161496	0.162691	0.163827	0.164923	0.165258	0.164986	0.164824	0.164623	0.164464	0.164391	0.164235	0.163976	0.163788	0.163767	0.163718	0.16353	0.163376	0.163372	0.163388	0.163335	0.163365	0.163483	0.163666	0.1639	0.164167	0.164451	0.164779	0.165138	0.165439
-0.0275682	-0.0273913	-0.0271742	-0.0269423	-0.0267355	-0.0265501	-0.0263687	-0.0262003	-0.026034	-0.0258675	-0.0256976	-0.0255353	-0.0253926	-0.0252641	-0.025152	-0.0250139	-0.024874	-0.0247729	-0.0246933	-0.0246244	-0.0245598	-0.0244536	-0.0242812	-0.024083	-0.0238808	-0.0236835	-0.0234921	-0.0232918	-0.0230866	-0.0228929	-0.0226822	-0.0224853	-0.0223457	-0.0221962	-0.0220008	-0.0217894	-0.0216189	-0.0214958	-0.0213463	-0.0211834	-0.0210463	-0.0209511	-0.0208831	-0.0208151	-0.0206894	-0.0205273	-0.0204617	-0.0206882	-0.0211187	-0.0215252
0.0304469	0.0303562	0.0302524	0.0301386	0.0300072	0.0298648	0.0297237	0.0295827	0.0294435	0.0293046	0.0291508	0.0289894	0.0288437	0.0286638	0.0284538	0.0282713	0.0281124	0.0279604	0.0277962	0.0276137	0.0274342	0.0272642	0.0271031	0.0269516	0.0268237	0.026726	0.0266085	0.0264545	0.0262907	0.0261268	0.025955	0.0257705	0.0255834	0.0253791	0.0252547	0.0251966	0.0251001	0.0249961	0.0248864	0.0247952	0.0247507	0.0247242	0.0246847	0.0246265	0.0245448	0.0244488	0.0243523	0.0242485	0.0241224	0.0239988
-0.00700107	-0.00697125	-0.00705968	-0.00722854	-0.00739641	-0.00753073	-0.00756481	-0.00749691	-0.00746171	-0.00746458	-0.00744659	-0.0074185	-0.00732924	-0.00711006	-0.00681273	-0.00653191	-0.00626673	-0.00607134	-0.00593218	-0.00578494	-0.0055565	-0.00524353	-0.00494335	-0.00466641	-0.00432221	-0.00389489	-0.00355311	-0.00330345	-0.00306122	-0.00282907	-0.00252515	-0.00215325	-0.00178938	-0.00142165	-0.00104332	-0.000660484	-0.000274812	0.000207848	0.000773272	0.00128688	0.00173328	0.00215235	0.00257923	0.00299572	0.00334677	0.00371208	0.00411116	0.00452269	0.00488985	0.00515463
0.0208524	0.0209835	0.0210678	0.0211306	0.0210946	0.0211048	0.021271	0.0213722	0.0213769	0.0213421	0.0212772	0.0211816	0.0210202	0.0208119	0.0205964	0.0204353	0.0203326	0.0202801	0.0202789	0.0200838	0.0196944	0.0194884	0.0194345	0.0192714	0.0188485	0.0182402	0.0173596	0.0162672	0.0152233	0.0141856	0.0131635	0.012213	0.0113699	0.0105672	0.00978506	0.00909685	0.00850953	0.00795387	0.00734695	0.00665535	0.00591605	0.00518009	0.00453235	0.00395344	0.00326719	0.00248906	0.0017236	0.000934315	0.000110486	-0.0007412
-0.0284904	-0.0283188	-0.0281555	-0.0279965	-0.0278391	-0.0276845	-0.0275358	-0.0273913	-0.0272508	-0.0271156	-0.026984	-0.0268564	-0.0267334	-0.0266128	-0.0264936	-0.0263746	-0.0262565	-0.0261429	-0.0260353	-0.0259311	-0.0258254	-0.0257177	-0.0256124	-0.0255103	-0.0254075	-0.0253015	-0.0251961	-0.0250953	-0.0249978	-0.0249011	-0.0248075	-0.0247178	-0.0246289	-0.0245412	-0.0244572	-0.0243769	-0.0242999	-0.0242253	-0.0241515	-0.0240769	-0.0240016	-0.0239235	-0.0238434	-0.0237676	-0.0236972	-0.0236265	-0.0235528	-0.0234781	-0.0234039	-0.0233314
-0.00616862	-0.00611242	-0.00605802	-0.00600164	-0.00594687	-0.00589643	-0.00584606	-0.00579679	-0.00574478	-0.00568369	-0.00563027	-0.00559146	-0.00555428	-0.00554322	-0.00556307	-0.00558986	-0.00564303	-0.00571541	-0.00578388	-0.00584899	-0.00590608	-0.00595366	-0.00599532	-0.00604224	-0.00607966	-0.00609168	-0.00611291	-0.00614707	-0.00617748	-0.00619959	-0.00621659	-0.00623632	-0.00625067	-0.00625079	-0.00623924	-0.00622703	-0.00621732	-0.00620645	-0.00619192	-0.00617615	-0.00615696	-0.00613389	-0.00610795	-0.00607733	-0.00605364	-0.00604428	-0.00603401	-0.00601158	-0.00598507	-0.00596077
-0.00434075	-0.00458857	-0.0048166	-0.00496833	-0.0050544	-0.00519122	-0.00538952	-0.00557474	-0.00563555	-0.00560077	-0.00557206	-0.00553875	-0.0054561	-0.00537461	-0.00533363	-0.00526942	-0.00517184	-0.00499926	-0.00480773	-0.0046525	-0.00456223	-0.00446581	-0.00427699	-0.00404981	-0.00383027	-0.00366068	-0.0034597	-0.00320454	-0.00297419	-0.00280469	-0.00266582	-0.00259475	-0.00259951	-0.00258056	-0.00254279	-0.00258095	-0.00259608	-0.00253537	-0.00256716	-0.00266698	-0.00275424	-0.00277342	-0.00269877	-0.0026529	-0.00265769	-0.00259415	-0.0024982	-0.00250036	-0.00260897	-0.00275943
-0.0394743	-0.0396248	-0.0397699	-0.0399451	-0.0401538	-0.0403672	-0.0405891	-0.0408114	-0.0410367	-0.0412765	-0.0415284	-0.0417805	-0.0420311	-0.0423096	-0.0426167	-0.0429283	-0.0432463	-0.0435729	-0.0439149	-0.0442694	-0.0446295	-0.0450005	-0.0453935	-0.0458039	-0.0462187	-0.046629	-0.0470298	-0.0474004	-0.0477418	-0.0480825	-0.0484304	-0.0487814	-0.0491436	-0.0495318	-0.0499411	-0.0503677	-0.050804	-0.0512332	-0.0516586	-0.0520848	-0.0525172	-0.0529797	-0.0534446	-0.0538788	-0.0542976	-0.0547075	-0.0551018	-0.0555342	-0.0560184	-0.0565132
0.016609	0.0166964	0.016782	0.0167946	0.0165317	0.0160912	0.0156938	0.0152569	0.0149591	0.0148386	0.0148381	0.0149157	0.0149556	0.0149855	0.0149868	0.0150213	0.0155307	0.0164493	0.0176107	0.0189404	0.0200569	0.0210573	0.0220809	0.0232035	0.0243697	0.0254658	0.0266232	0.0278332	0.0290112	0.0301631	0.0312648	0.0322076	0.0329515	0.0332813	0.0335377	0.0341421	0.0348021	0.035429	0.0360304	0.0364966	0.0368047	0.0367463	0.0363649	0.0359885	0.0359226	0.0361587	0.0363956	0.0363378	0.0359685	0.0355761
0.00405327	0.00395894	0.00388822	0.00384113	0.00378602	0.00371914	0.0036538	0.00359999	0.00354337	0.0034681	0.00338104	0.00329836	0.00326757	0.00328187	0.00330173	0.00332864	0.00335191	0.00336032	0.00336308	0.00337048	0.00338017	0.00339541	0.00341895	0.00344945	0.00348447	0.00351821	0.00354471	0.00357084	0.00360395	0.00364175	0.00368463	0.00373656	0.00379658	0.00384564	0.0038782	0.00391402	0.00395308	0.00399477	0.00404092	0.00407731	0.0041165	0.00416296	0.00419885	0.00422989	0.00426601	0.00430214	0.00434498	0.00440667	0.0044645	0.00449953
0.0276081	0.0279106	0.0282058	0.0285026	0.0287843	0.0290532	0.029324	0.0296815	0.0301072	0.0305035	0.0308866	0.0312735	0.0316463	0.0319852	0.032303	0.0326202	0.0329386	0.0332431	0.0335326	0.0338215	0.0341213	0.034418	0.0346879	0.0349185	0.0351172	0.0352911	0.0354453	0.0355798	0.0357006	0.0358151	0.0359247	0.0360481	0.0361781	0.0362958	0.0363956	0.036478	0.0365612	0.0366622	0.036756	0.0368445	0.0369591	0.0370903	0.0372074	0.0372967	0.0374307	0.0376162	0.0377803	0.0379219	0.0380563	0.0381992
-0.0755591	-0.0758233	-0.0759624	-0.0759757	-0.0759905	-0.0761124	-0.0763122	-0.0764861	-0.076653	-0.0768056	-0.0769364	-0.0770398	-0.0770287	-0.0769073	-0.0767187	-0.0764778	-0.0762201	-0.0760723	-0.0759729	-0.0756777	-0.075292	-0.0750418	-0.074917	-0.0746051	-0.0741061	-0.0735273	-0.0728647	-0.0721989	-0.071549	-0.0710337	-0.0707993	-0.0707454	-0.0705921	-0.070321	-0.0700302	-0.0697279	-0.0693254	-0.0688221	-0.0683206	-0.0678499	-0.0673972	-0.0670309	-0.0667475	-0.0665347	-0.0663896	-0.0662234	-0.0660328	-0.0658217	-0.0656288	-0.0654479
-0.00282894	-0.00264963	-0.00258383	-0.00265345	-0.00274725	-0.00286199	-0.00292525	-0.00294217	-0.00298166	-0.00303899	-0.00310889	-0.00315835	-0.00317318	-0.00319226	-0.00322464	-0.00325286	-0.00326643	-0.00325267	-0.00323258	-0.0033884	-0.00371332	-0.00396915	-0.00400993	-0.00389611	-0.00370916	-0.00345935	-0.00321889	-0.00300973	-0.00283457	-0.00266966	-0.00250726	-0.00235427	-0.0022074	-0.00205792	-0.00190939	-0.00176923	-0.00164647	-0.0015469	-0.00145081	-0.00134762	-0.00124628	-0.00115999	-0.00109887	-0.00105843	-0.00103436	-0.00102187	-0.00101341	-0.000982889	-0.000942367	-0.000936688
0.00597079	0.00556899	0.00520196	0.00485104	0.00449727	0.00418425	0.00392116	0.00368332	0.0034739	0.00326741	0.00305417	0.00283693	0.00259603	0.00235336	0.00213452	0.00194071	0.00176753	0.00158529	0.00138392	0.00118677	0.000995242	0.000803526	0.0005943	0.000378091	0.000178236	-3.23322e-05	-0.000262637	-0.000483542	-0.000709456	-0.00093814	-0.00113705	-0.00126872	-0.00135327	-0.0013811	-0.00134835	-0.00119394	-0.000909998	-0.000615576	-0.000301944	1.62624e-05	0.00030656	0.00057302	0.00084953	0.00117478	0.00153107	0.00187304	0.00218054	0.00244679	0.00257301	0.00258173
0.0443567	0.043595	0.0428216	0.0420443	0.0412744	0.0405227	0.0397764	0.0390162	0.038221	0.0374076	0.0366182	0.0358522	0.0351626	0.0345409	0.0339076	0.0332772	0.0326698	0.0320542	0.0314363	0.0307913	0.0301087	0.0294764	0.0289092	0.0283513	0.0277974	0.0272741	0.0269289	0.0267657	0.0265883	0.0263956	0.0262279	0.0261279	0.0260825	0.0260219	0.0259536	0.0258828	0.0257816	0.0256558	0.0255326	0.0252857	0.0249005	0.0244861	0.0241328	0.0238589	0.0235956	0.0233093	0.0229992	0.022704	0.0224052	0.0221021
0.0833946	0.084394	0.0852296	0.0860481	0.086858	0.0876949	0.0885341	0.089454	0.0899863	0.0898427	0.0896727	0.0896613	0.0894416	0.0893174	0.0896776	0.0901956	0.0907424	0.0909441	0.0906036	0.0899388	0.0894402	0.0891941	0.0888781	0.0884995	0.0880571	0.0878088	0.0878119	0.0878913	0.0880057	0.0881725	0.0884298	0.0887365	0.0890443	0.0893589	0.0896612	0.090015	0.0904722	0.0909899	0.0915462	0.0919237	0.0920848	0.0918982	0.0913924	0.0906538	0.0896858	0.0887641	0.0875648	0.0862526	0.0851499	0.0839986
-0.00264169	-0.00256813	-0.00250318	-0.00244657	-0.00241184	-0.00239727	-0.00238946	-0.0023759	-0.00234538	-0.00231406	-0.00226978	-0.00220782	-0.00214745	-0.0020697	-0.00197238	-0.00185699	-0.00171645	-0.00159658	-0.00149739	-0.00139757	-0.00129906	-0.00119275	-0.00107191	-0.000946064	-0.000830378	-0.000734482	-0.000647042	-0.000547679	-0.000446913	-0.000357689	-0.000276333	-0.000203117	-0.000144719	-9.60773e-05	-4.81381e-05	-1.62123e-06	5.18755e-05	0.000105679	0.000146281	0.000171183	0.00018794	0.000189226	0.000181733	0.000180535	0.000184016	0.000198014	0.000203506	0.000184189	0.000146056	9.90685e-05
0.00937229	0.00937975	0.00938775	0.00939549	0.00939933	0.00939677	0.0093898	0.0093875	0.00938647	0.00938179	0.00937927	0.0093792	0.00937505	0.00936804	0.00936474	0.00936561	0.00937093	0.0093772	0.00938326	0.00939042	0.00939904	0.00940757	0.0094152	0.00942214	0.00942627	0.0094229	0.00941564	0.00940948	0.00940398	0.00940189	0.00940288	0.00940335	0.00940255	0.00940298	0.00940572	0.00940937	0.00941012	0.00940852	0.00940763	0.00940499	0.00939949	0.00939272	0.00938443	0.00937525	0.00936769	0.00936182	0.00935616	0.00935183	0.00934724	0.00934156
[truncated: 5,000 more columns]

## Sheet: Figure_6B
6B faces effect on omega, rows are participants, means and SEM last 2 rows
0.0188297	0.0187342	0.0186694	0.0186145	0.018553	0.0184855	0.0184188	0.0183752	0.0183499	0.0183284	0.0183099	0.0182898	0.0182654	0.0182407	0.0182119	0.018177	0.0181554	0.0181457	0.0181344	0.0181301	0.0181456	0.018169	0.0181872	0.0182096	0.0182375	0.0182658	0.018294	0.0183268	0.0183794	0.0184573	0.0185302	0.0185863	0.0186382	0.0186848	0.018725	0.0187643	0.0188143	0.0188827	0.0189619	0.0190278	0.0190806	0.0191417	0.0192154	0.0192912	0.0193576	0.0194201	0.0194936	0.019563	0.0196171	0.0196789
-0.00973366	-0.00992277	-0.010101	-0.0102853	-0.0104752	-0.0106498	-0.010815	-0.0109665	-0.0111129	-0.0112597	-0.0113983	-0.0115926	-0.0118824	-0.0122086	-0.0124903	-0.0127231	-0.0129562	-0.0131829	-0.0133927	-0.0135902	-0.0137633	-0.0139107	-0.0140355	-0.0141813	-0.0143721	-0.0145413	-0.0146592	-0.0147579	-0.0148684	-0.0149954	-0.0151121	-0.015223	-0.0153546	-0.0154607	-0.015524	-0.015578	-0.015627	-0.0156799	-0.0157455	-0.0158244	-0.0159375	-0.0160793	-0.0162122	-0.01633	-0.016442	-0.0165801	-0.0167193	-0.016838	-0.0169735	-0.0171182
-0.0393922	-0.0394701	-0.039533	-0.039563	-0.0395971	-0.0396598	-0.0397131	-0.0397536	-0.039792	-0.0398265	-0.0398525	-0.039874	-0.0398967	-0.039921	-0.0399445	-0.0399678	-0.0399821	-0.0399804	-0.0399701	-0.0399551	-0.0399374	-0.03992	-0.0399031	-0.0398802	-0.0398463	-0.0398013	-0.0397471	-0.0396879	-0.0396257	-0.0395592	-0.0394928	-0.039439	-0.0393941	-0.0393443	-0.0392875	-0.0392255	-0.0391442	-0.0390463	-0.0389474	-0.0388454	-0.0387396	-0.0386455	-0.038569	-0.038495	-0.0384178	-0.0381938	-0.0378267	-0.0374626	-0.0372521	-0.0371953
0.0609802	0.0609445	0.0608947	0.0608677	0.0608516	0.0608141	0.0607876	0.060773	0.0607485	0.0607224	0.0606737	0.0606781	0.0607484	0.0607877	0.0607899	0.0607853	0.0607896	0.0607806	0.0607559	0.0607273	0.0606998	0.0606806	0.0606617	0.0606354	0.0606121	0.0605984	0.0605876	0.0605713	0.0605151	0.0604308	0.0603498	0.0602747	0.0602169	0.0601668	0.0601294	0.0601017	0.0600762	0.0600571	0.0600565	0.0600575	0.0599829	0.0598421	0.0596927	0.0595442	0.0594225	0.0592943	0.0591384	0.0589799	0.0588247	0.0587108
-0.0245515	-0.0245335	-0.0245381	-0.0245594	-0.0245972	-0.0246318	-0.0246654	-0.0247252	-0.0247974	-0.0248627	-0.0249544	-0.025063	-0.0251653	-0.0252663	-0.025368	-0.025473	-0.0255627	-0.0256294	-0.0257007	-0.0257768	-0.0258495	-0.0259473	-0.0260175	-0.0260653	-0.0261465	-0.0262236	-0.0262948	-0.0263557	-0.0264766	-0.0266607	-0.0268418	-0.0270251	-0.027205	-0.0273666	-0.0275264	-0.0277085	-0.0278809	-0.0280424	-0.0282049	-0.0283918	-0.028594	-0.0287775	-0.0289669	-0.0292045	-0.0294566	-0.0296664	-0.0298501	-0.0300212	-0.0302098	-0.0304198
0.0498019	0.0494114	0.0490367	0.0486474	0.0482066	0.0477423	0.0472779	0.0467791	0.0463708	0.0460629	0.0457301	0.0453954	0.0450641	0.0446965	0.0442647	0.0438154	0.0433692	0.0429311	0.0425453	0.0421898	0.0418328	0.0414723	0.0411073	0.0407836	0.0404674	0.0401154	0.0397666	0.0394128	0.0390409	0.0386826	0.0383205	0.037969	0.0376354	0.0372695	0.036874	0.0364824	0.0361061	0.0356901	0.0352539	0.0348498	0.0344887	0.0341291	0.033739	0.0333412	0.0329591	0.0325965	0.0322469	0.0318982	0.0314679	0.0309738
0.0824711	0.0827125	0.0829616	0.0831503	0.083322	0.0835243	0.0837176	0.0839029	0.0841072	0.0843306	0.0845505	0.0848256	0.0851462	0.0854441	0.0857269	0.0859973	0.0862121	0.086388	0.0865218	0.0866251	0.0867484	0.0868779	0.0870787	0.0873313	0.0875648	0.0877994	0.0880821	0.0883851	0.0886783	0.0889838	0.0892883	0.0895852	0.0898599	0.0901303	0.090418	0.0907125	0.0909929	0.0912524	0.0915044	0.0917427	0.0919799	0.0922169	0.092443	0.0926878	0.0929251	0.0931344	0.0933321	0.0935329	0.0936842	0.0938082
0.0470987	0.0478998	0.0486888	0.0494482	0.0501752	0.050883	0.0516021	0.052321	0.0529267	0.0534346	0.0539314	0.0544112	0.0548798	0.0553414	0.0558032	0.0562627	0.0567277	0.0572073	0.0576942	0.0581674	0.0586313	0.0589564	0.0591437	0.0592177	0.0589724	0.0585279	0.0581138	0.0577526	0.0575365	0.0574558	0.0573981	0.0572318	0.0569633	0.0567073	0.0564723	0.0562708	0.0560755	0.0560106	0.0560683	0.0561167	0.0561993	0.0563141	0.0562754	0.0561079	0.0559631	0.0558034	0.0556752	0.0556066	0.0555148	0.0553803
-0.0209685	-0.0198444	-0.0187636	-0.0178284	-0.0170489	-0.0163321	-0.0157133	-0.0152056	-0.0148483	-0.0143977	-0.0137484	-0.0132894	-0.0130119	-0.0126996	-0.0123687	-0.0120274	-0.0116638	-0.0112915	-0.0108605	-0.0104935	-0.0102322	-0.0100004	-0.00998525	-0.0101109	-0.010192	-0.0101997	-0.0101059	-0.00996051	-0.009799	-0.00961868	-0.00953825	-0.00952119	-0.00910737	-0.008332	-0.00753757	-0.00674237	-0.00595196	-0.00533738	-0.00485194	-0.00431555	-0.0037697	-0.00319993	-0.0026271	-0.00206885	-0.00141361	-0.000656078	9.98637e-05	0.000841294	0.0015714	0.00233683
-0.0624623	-0.0631106	-0.0637144	-0.0642842	-0.064852	-0.0652696	-0.0655328	-0.0657901	-0.0659699	-0.0661765	-0.0663568	-0.0664329	-0.066417	-0.0662805	-0.0661298	-0.0658982	-0.0656604	-0.0653766	-0.0650689	-0.0646676	-0.0639488	-0.0628967	-0.0615475	-0.0601625	-0.058875	-0.0576484	-0.056462	-0.055244	-0.0540553	-0.0529315	-0.0518051	-0.0507011	-0.0497922	-0.0494444	-0.0494701	-0.0494559	-0.0493673	-0.0492201	-0.0489796	-0.0486573	-0.0483126	-0.0479572	-0.0476565	-0.0473899	-0.047047	-0.0466126	-0.0460418	-0.0453243	-0.0445636	-0.043784
-0.0229954	-0.0235608	-0.0240889	-0.024719	-0.0254146	-0.0259438	-0.0263197	-0.026667	-0.0269478	-0.0270991	-0.0271758	-0.027256	-0.0272339	-0.0271095	-0.0269965	-0.026899	-0.0268759	-0.0269506	-0.0271015	-0.0272934	-0.0274634	-0.0275935	-0.0277143	-0.0278492	-0.0279321	-0.0279896	-0.0280188	-0.028093	-0.0282558	-0.0283603	-0.028422	-0.0285518	-0.0287704	-0.0290249	-0.0291693	-0.0291762	-0.0291234	-0.0290735	-0.0291408	-0.0292995	-0.02943	-0.0295121	-0.0295894	-0.0297048	-0.0298487	-0.0299702	-0.0300748	-0.0301917	-0.0303235	-0.0304541
0.0220851	0.022087	0.0220864	0.0220892	0.0220984	0.0221063	0.0221116	0.0221172	0.0221123	0.0221002	0.02209	0.022085	0.0220836	0.0220817	0.0220802	0.0220717	0.0220639	0.022068	0.022074	0.0220932	0.0221277	0.022158	0.0221805	0.0221971	0.02221	0.0222249	0.0222488	0.0222802	0.0223139	0.0223468	0.0223722	0.0223855	0.0223902	0.0223978	0.0224102	0.0224238	0.0224376	0.022448	0.0224579	0.0224745	0.0224958	0.0225115	0.0225197	0.0225319	0.0225491	0.0225646	0.0225792	0.0225919	0.0226016	0.0226076
0.0150171	0.0150415	0.0151803	0.0153233	0.0153461	0.0152526	0.0151779	0.0151245	0.01507	0.0150029	0.0151454	0.0155013	0.0157392	0.0159664	0.0161817	0.0163892	0.0167028	0.0168946	0.0169694	0.0171558	0.0174429	0.0176003	0.0176397	0.0176792	0.0177137	0.0177516	0.0177962	0.017838	0.0179335	0.0180703	0.0182089	0.0183579	0.0184977	0.0186399	0.01879	0.0189247	0.0190441	0.019139	0.0191991	0.0192615	0.019335	0.019407	0.0194213	0.0194796	0.0195297	0.0194748	0.0194201	0.0193663	0.0193267	0.0192991
-0.0265469	-0.0265367	-0.0265302	-0.0265111	-0.0264835	-0.0264661	-0.0264539	-0.0264486	-0.0264448	-0.0264291	-0.026419	-0.0264188	-0.026425	-0.0264427	-0.026466	-0.0264875	-0.0265088	-0.0265337	-0.0265553	-0.0265805	-0.0266111	-0.0266477	-0.0266897	-0.0267381	-0.0267906	-0.0268418	-0.0269043	-0.0269754	-0.027039	-0.0270939	-0.0271484	-0.0272097	-0.0272672	-0.0273181	-0.0273698	-0.0274273	-0.0274969	-0.0275724	-0.0276435	-0.0277119	-0.027768	-0.0278068	-0.0278368	-0.0278554	-0.0278523	-0.0278324	-0.0278159	-0.0277773	-0.0277274	-0.0277084
0.0188082	0.018836	0.0188458	0.0188606	0.0188814	0.0188459	0.0187605	0.018679	0.018618	0.0185638	0.0185107	0.0184665	0.0184313	0.0183663	0.018269	0.0181582	0.0180112	0.017832	0.0176649	0.0175053	0.017332	0.0171551	0.0169617	0.0167731	0.0166209	0.0164984	0.0163799	0.0162327	0.0160546	0.0159016	0.0158016	0.0157221	0.015631	0.0155092	0.0153631	0.0152268	0.015154	0.015131	0.0150802	0.0150119	0.0149851	0.0150001	0.0150462	0.0151111	0.0151687	0.0152157	0.0152462	0.0152822	0.0153494	0.015438
0.0177411	0.0174326	0.0171194	0.016787	0.0164504	0.0161152	0.0158064	0.0155237	0.0152506	0.0150096	0.0147828	0.0145328	0.0142824	0.0139947	0.0136731	0.0133204	0.012919	0.0125469	0.0122129	0.0118641	0.0115029	0.0111738	0.0108663	0.0105692	0.0102909	0.0100222	0.00981354	0.00970795	0.00965429	0.00958502	0.00948655	0.00938028	0.00928909	0.00926062	0.00927258	0.00927823	0.00927667	0.00926532	0.00923466	0.00919492	0.00917167	0.0091562	0.00916776	0.00920384	0.00924515	0.00931323	0.00938996	0.00946035	0.00951918	0.00955655
0.0146856	0.014288	0.0138935	0.0134981	0.0131134	0.0127327	0.0123615	0.0120238	0.0117062	0.0113743	0.0110225	0.0106685	0.0103067	0.00992615	0.00952993	0.00912328	0.00870613	0.00828736	0.00787278	0.00740158	0.00689272	0.00640256	0.00593603	0.00549032	0.0050576	0.00465163	0.0042669	0.00390265	0.00361056	0.00339347	0.00326174	0.00318932	0.00310244	0.00300929	0.00291381	0.00280243	0.00266244	0.0025144	0.0023971	0.00228711	0.00217383	0.00209511	0.0020507	0.00201477	0.00196106	0.00190999	0.00186417	0.00181437	0.00177393	0.00174416
-0.0617325	-0.0615891	-0.0614442	-0.0612998	-0.060931	-0.060286	-0.0595873	-0.0588855	-0.0581909	-0.0575718	-0.0570146	-0.0564652	-0.0559473	-0.0554546	-0.0550337	-0.054677	-0.0543361	-0.0540336	-0.0537005	-0.0533657	-0.0531979	-0.0531364	-0.0530785	-0.0531344	-0.0532559	-0.0532582	-0.0531946	-0.0531365	-0.0530607	-0.052981	-0.0528616	-0.0527446	-0.0526333	-0.0524754	-0.0523115	-0.0521365	-0.0519468	-0.0517637	-0.0516155	-0.0514792	-0.0512279	-0.0509011	-0.0505755	-0.0503448	-0.0503143	-0.050363	-0.0503092	-0.0500502	-0.0497646	-0.0494961
0.0223683	0.0223453	0.0223143	0.0222822	0.0222443	0.0221951	0.0221389	0.0220815	0.0220245	0.0219619	0.0218931	0.0218252	0.0217674	0.0217109	0.0216443	0.0215776	0.0215194	0.0214707	0.0214269	0.0213813	0.0213417	0.0213159	0.0212927	0.0212691	0.0212529	0.0212423	0.0212354	0.0212389	0.0212497	0.0212673	0.0212907	0.0212532	0.0211549	0.021057	0.0209561	0.0208396	0.0207228	0.0206221	0.0205232	0.0204139	0.020303	0.020195	0.0200853	0.0199761	0.0198646	0.0197454	0.0196251	0.0195048	0.0193821	0.0192616
-0.0980675	-0.0981322	-0.0981387	-0.0980422	-0.0978991	-0.0978107	-0.0977799	-0.0977615	-0.0977541	-0.0977466	-0.0977415	-0.0977398	-0.0977322	-0.0977156	-0.0976878	-0.0976795	-0.0976514	-0.0975901	-0.0975492	-0.0975495	-0.0975939	-0.0976983	-0.0978805	-0.0980844	-0.0982682	-0.0984288	-0.0985801	-0.0987408	-0.0989097	-0.0990764	-0.0992323	-0.0993177	-0.0993451	-0.099389	-0.0994415	-0.0994675	-0.099478	-0.0995061	-0.0995464	-0.0995977	-0.0996621	-0.0997927	-0.0999225	-0.0999893	-0.100059	-0.100121	-0.100169	-0.100204	-0.100235	-0.100277
0.00620235	0.00608931	0.00583523	0.0055827	0.00538022	0.00522644	0.0051217	0.00505914	0.00508826	0.00526138	0.00556938	0.00576998	0.00579653	0.00589307	0.0061308	0.00648808	0.00672882	0.00679401	0.00684759	0.00689186	0.00692421	0.00693189	0.00707291	0.00727092	0.00730413	0.00720515	0.00703701	0.0069229	0.00691967	0.00701239	0.00696598	0.00690318	0.00698956	0.00703557	0.00687633	0.00652625	0.00624367	0.00610704	0.00609974	0.00597236	0.00568909	0.00546203	0.005291	0.00509187	0.00484902	0.00468364	0.00465167	0.00472882	0.00468878	0.00448548
-0.0157338	-0.0159373	-0.0161177	-0.0163268	-0.0165649	-0.0168045	-0.0170603	-0.0173093	-0.0175418	-0.0177622	-0.0179699	-0.0181598	-0.0183268	-0.0184628	-0.0185704	-0.0186655	-0.0187173	-0.0187301	-0.0187389	-0.0187393	-0.0187207	-0.018676	-0.0186119	-0.0185438	-0.0185042	-0.0184761	-0.0184207	-0.0183677	-0.0183291	-0.0182734	-0.018203	-0.0179934	-0.0176514	-0.0173169	-0.0170035	-0.0167078	-0.0164254	-0.016153	-0.0158777	-0.0155825	-0.0152783	-0.0149954	-0.0147254	-0.014462	-0.0141985	-0.0139357	-0.013697	-0.0134852	-0.0132789	-0.0130793
0.0184822	0.0185592	0.0186129	0.0186465	0.0186196	0.018536	0.0184412	0.0183532	0.0182648	0.0181349	0.0178818	0.0175483	0.017225	0.0169027	0.0165713	0.0162102	0.015834	0.0155191	0.0152609	0.0150072	0.0147501	0.0145274	0.014344	0.0141785	0.0140379	0.0138864	0.0137065	0.0134743	0.0131173	0.0126592	0.0121967	0.0117841	0.0114168	0.0110401	0.0106505	0.0102573	0.00984141	0.00940647	0.00899531	0.00864147	0.00823334	0.0077438	0.00726146	0.00679829	0.0063675	0.00604222	0.00580594	0.00558254	0.00538375	0.00519282
0.0519051	0.0517923	0.0516723	0.0515863	0.0514824	0.0513347	0.0512132	0.0511017	0.0509864	0.050865	0.0507541	0.0506536	0.0505482	0.0504243	0.0502923	0.0501818	0.0501049	0.0500544	0.0500475	0.0500647	0.0500676	0.0500691	0.0500583	0.0500229	0.0499817	0.0499527	0.0499513	0.0499604	0.0499532	0.0499314	0.0498938	0.0498347	0.0497794	0.049733	0.0496721	0.0495953	0.049513	0.0494443	0.049427	0.0494559	0.0494911	0.0495244	0.049548	0.0495332	0.0494866	0.0494275	0.0493548	0.0492839	0.0492225	0.0491565
0.00378257	0.00380425	0.0038294	0.00383356	0.00384094	0.00387581	0.00392662	0.00397595	0.00402013	0.00406393	0.00411114	0.00415819	0.00420471	0.00425609	0.00430977	0.00436524	0.00442457	0.00448553	0.00454699	0.00460782	0.0046671	0.00472603	0.00478442	0.0048416	0.00490355	0.00497085	0.00503623	0.00509624	0.00515272	0.00521056	0.00527175	0.00533167	0.00539063	0.00545431	0.00552141	0.00558896	0.00565941	0.00573279	0.00580614	0.00587805	0.0059479	0.0060178	0.00608942	0.00616224	0.00623449	0.00630691	0.00638131	0.00646012	0.0065417	0.00662258
0.0175423	0.01785	0.0181994	0.0185542	0.0189094	0.0192663	0.0196541	0.0200697	0.0204638	0.0208387	0.0211486	0.0214377	0.0217177	0.021993	0.0223066	0.0225984	0.0228537	0.0230923	0.0233607	0.023644	0.0239037	0.0240824	0.0242261	0.0244077	0.0245964	0.0247675	0.0248853	0.0249578	0.0250266	0.0251099	0.0251968	0.0253006	0.0254076	0.0254876	0.0255611	0.0256515	0.025722	0.0257595	0.0257972	0.0258414	0.0258591	0.025833	0.0257872	0.0257919	0.0258484	0.0258969	0.0259474	0.0260129	0.0260682	0.0260195
-0.0671982	-0.0677736	-0.0683646	-0.0689636	-0.0695161	-0.0699617	-0.07032	-0.0707732	-0.0713306	-0.0719064	-0.0725091	-0.0731388	-0.0738027	-0.0745706	-0.0753793	-0.0761518	-0.0769743	-0.0778272	-0.0786261	-0.0792597	-0.0799248	-0.0808045	-0.0816923	-0.0824976	-0.0832393	-0.0843642	-0.0858723	-0.0873251	-0.0887327	-0.0900569	-0.0912887	-0.0926065	-0.094024	-0.0953501	-0.0964626	-0.0975613	-0.0987866	-0.099922	-0.100838	-0.101587	-0.102244	-0.102772	-0.103241	-0.103704	-0.104152	-0.104578	-0.104984	-0.105382	-0.105772	-0.106155
-0.00509521	-0.00481563	-0.0045789	-0.00437584	-0.00416606	-0.0039504	-0.00373205	-0.00350401	-0.00328273	-0.00307066	-0.00284704	-0.00274661	-0.00277212	-0.0027744	-0.00276206	-0.00268415	-0.00257024	-0.00249099	-0.00239361	-0.00227265	-0.00215829	-0.00191082	-0.00152812	-0.0011699	-0.000836661	-0.000497507	-0.000123738	0.000282776	0.000693599	0.00109056	0.00146512	0.00184757	0.00225489	0.00267075	0.00308076	0.00348826	0.00387606	0.00422526	0.00457407	0.00494618	0.00532513	0.00566472	0.00597263	0.00627788	0.00656987	0.00684697	0.00715739	0.00759257	0.00810528	0.00859922
0.0845092	0.084398	0.0843008	0.0842018	0.0841068	0.0840161	0.0839239	0.0838283	0.0837278	0.0836359	0.0835516	0.0834573	0.0833563	0.0832562	0.0831526	0.0830462	0.0829416	0.0828427	0.0827612	0.0826991	0.0826443	0.0825871	0.0825349	0.082502	0.0824737	0.0824366	0.0824143	0.0824156	0.0824157	0.0824071	0.0823946	0.0823791	0.082365	0.0823945	0.0825497	0.0827685	0.0829605	0.0831462	0.0833293	0.0834811	0.083599	0.0837105	0.0838156	0.0839138	0.0840115	0.084107	0.0841901	0.0842667	0.0843451	0.0844267
-0.0804058	-0.0805123	-0.0806226	-0.0807742	-0.0809135	-0.0810533	-0.0811123	-0.0811371	-0.0812756	-0.0814957	-0.0817196	-0.0819435	-0.082073	-0.082153	-0.0822753	-0.082391	-0.0824824	-0.0825181	-0.0825321	-0.0825651	-0.0825489	-0.0824928	-0.0824448	-0.0823957	-0.0823845	-0.0824264	-0.0824404	-0.0824369	-0.0824356	-0.0824068	-0.0824173	-0.0824996	-0.0826021	-0.082696	-0.082783	-0.0828642	-0.0829073	-0.0830367	-0.0832853	-0.0835684	-0.0838721	-0.0841416	-0.0843818	-0.0846085	-0.0848377	-0.0850521	-0.0852673	-0.0854512	-0.0855977	-0.0857684
-0.0137313	-0.0134599	-0.013148	-0.0128887	-0.0126749	-0.0128314	-0.0132196	-0.0136088	-0.01404	-0.0144398	-0.0148322	-0.0151794	-0.0155459	-0.0159445	-0.016306	-0.0164255	-0.0163335	-0.0163533	-0.0164375	-0.0161906	-0.0156407	-0.0155648	-0.0159657	-0.0163467	-0.0166525	-0.0168862	-0.016706	-0.0160677	-0.0154634	-0.0149411	-0.0143393	-0.0137293	-0.0131264	-0.0125179	-0.0119914	-0.011603	-0.0112943	-0.010943	-0.0105179	-0.0100079	-0.00936305	-0.00862599	-0.00795646	-0.00713324	-0.00609285	-0.00472058	-0.00305518	-0.00141935	0.000209706	0.00181726
0.00169815	0.00166346	0.0016291	0.00159416	0.00155918	0.00152541	0.00149256	0.00145859	0.00142487	0.00139329	0.00136306	0.00133363	0.00130409	0.00127637	0.00125082	0.00122327	0.00119436	0.00116826	0.00114463	0.00112081	0.00109448	0.00106753	0.00104405	0.00102299	0.000999461	0.000970723	0.000940535	0.000913372	0.000888674	0.000864519	0.000839629	0.000813624	0.000786284	0.000759487	0.000736519	0.000717382	0.000698273	0.000676258	0.000653724	0.000632162	0.000610834	0.000589416	0.00056481	0.000538187	0.00051396	0.000489636	0.000462809	0.000435413	0.000407803	0.00038047
0.0353487	0.0353636	0.0353799	0.0353992	0.0354107	0.0354099	0.0354022	0.0353902	0.0353771	0.0353673	0.0353576	0.0353433	0.0353244	0.0353181	0.0353289	0.0353434	0.0353558	0.035366	0.0353788	0.0353917	0.0354082	0.0354326	0.0354583	0.0354819	0.0355116	0.0355448	0.0355657	0.0355743	0.0355801	0.0355874	0.0355932	0.0355905	0.0355799	0.0355675	0.0355502	0.0355208	0.0354833	0.0354474	0.0354143	0.0353816	0.0353493	0.0353142	0.0352756	0.0352392	0.0352011	0.0351545	0.0351041	0.0350503	0.0349895	0.0349247
0.0111403	0.0110317	0.0109234	0.010865	0.0108611	0.0108584	0.0108632	0.0108696	0.0107727	0.0105934	0.0104201	0.010241	0.0100273	0.00977006	0.00949525	0.00919787	0.00887083	0.00853636	0.00820267	0.00788	0.0076103	0.00734885	0.00705032	0.00678287	0.00659486	0.00647158	0.00639094	0.00633516	0.00630521	0.00624784	0.00618451	0.0061695	0.0061441	0.00609689	0.00604921	0.0060586	0.00608507	0.00605622	0.00604818	0.00608676	0.00609252	0.00602203	0.00593731	0.0059304	0.00598299	0.00605258	0.0061029	0.00612913	0.00614534	0.0061502
-0.12069	-0.120787	-0.120881	-0.120989	-0.121108	-0.121201	-0.121262	-0.121307	-0.121335	-0.121349	-0.121341	-0.121309	-0.12127	-0.121224	-0.121164	-0.121079	-0.120971	-0.120847	-0.120695	-0.1205	-0.120264	-0.12	-0.119754	-0.119527	-0.119283	-0.11903	-0.118769	-0.118488	-0.118184	-0.117859	-0.117519	-0.117171	-0.116814	-0.116454	-0.116093	-0.115728	-0.11536	-0.114993	-0.114628	-0.114257	-0.113883	-0.113524	-0.113187	-0.112874	-0.112579	-0.112298	-0.11204	-0.11179	-0.11154	-0.111291
-0.0996781	-0.100018	-0.100352	-0.100656	-0.101035	-0.101336	-0.101471	-0.101596	-0.101917	-0.102406	-0.102923	-0.103379	-0.103734	-0.104083	-0.104403	-0.104705	-0.104774	-0.104607	-0.104504	-0.10449	-0.104513	-0.104628	-0.104819	-0.104994	-0.105136	-0.105288	-0.105377	-0.105388	-0.105413	-0.105452	-0.105565	-0.105726	-0.105972	-0.106204	-0.106416	-0.106779	-0.107202	-0.107622	-0.10802	-0.108438	-0.108866	-0.109147	-0.109294	-0.10944	-0.109703	-0.110054	-0.110355	-0.110537	-0.110643	-0.110787
0.247152	0.246664	0.246185	0.245712	0.245236	0.244742	0.244233	0.243726	0.243219	0.24272	0.242251	0.241804	0.241217	0.240483	0.239752	0.239023	0.238308	0.23761	0.23692	0.236232	0.235543	0.234851	0.234167	0.233507	0.232861	0.232222	0.231588	0.230968	0.230357	0.229748	0.229145	0.22855	0.227954	0.227363	0.226783	0.22621	0.225645	0.225084	0.224527	0.223983	0.223453	0.22292	0.222379	0.221838	0.221303	0.220769	0.220236	0.21972	0.219213	0.218697
0.0531107	0.0533507	0.0535838	0.053813	0.054054	0.0543245	0.0546159	0.0549424	0.0552963	0.055637	0.0559672	0.0562949	0.0566302	0.0569849	0.0573454	0.0576901	0.0580299	0.0583732	0.05872	0.0590729	0.0594127	0.059746	0.0601049	0.0604881	0.0608792	0.0612351	0.0615739	0.0619373	0.0622827	0.0625943	0.0628969	0.0631928	0.0634893	0.0638003	0.0641277	0.0644702	0.0648073	0.0651279	0.0654502	0.0657702	0.0660826	0.0664058	0.066742	0.0670758	0.0673391	0.0675368	0.0677311	0.067926	0.0681334	0.0683668
-0.0505115	-0.0507289	-0.0509012	-0.0510317	-0.0511492	-0.0512824	-0.051393	-0.0514468	-0.0514849	-0.0515098	-0.0515183	-0.0515143	-0.0515881	-0.0516993	-0.0517428	-0.0517642	-0.0517459	-0.0517479	-0.0517982	-0.0518654	-0.0520271	-0.0522465	-0.0524909	-0.0527376	-0.0529462	-0.0531384	-0.0533185	-0.053441	-0.0535477	-0.0536893	-0.0539195	-0.0542308	-0.0545185	-0.0547559	-0.0549517	-0.0551351	-0.0553033	-0.0554669	-0.055635	-0.0558389	-0.0560642	-0.056276	-0.0564876	-0.0566767	-0.0568189	-0.0569317	-0.0570493	-0.0571762	-0.0573232	-0.0574861
0.0032114	0.00337052	0.00341615	0.00338205	0.00335282	0.00334026	0.00326329	0.00312732	0.00301876	0.0028557	0.00264619	0.00248847	0.0023774	0.00229748	0.00224596	0.00223035	0.00225139	0.00233347	0.00241289	0.0026069	0.00295646	0.00323457	0.00346105	0.00359396	0.00361024	0.00362107	0.00364745	0.00369711	0.00377577	0.0038781	0.00399292	0.00412356	0.00425893	0.00446984	0.00475436	0.00501735	0.00526332	0.00552062	0.00580021	0.00608548	0.00635245	0.00651611	0.00665796	0.00686706	0.00706918	0.0073168	0.00757647	0.0077464	0.00782614	0.00786573
-0.0183903	-0.0183461	-0.0183338	-0.0183041	-0.0182578	-0.0182494	-0.0182833	-0.0183157	-0.0183168	-0.018276	-0.0182262	-0.0181808	-0.0181305	-0.0180362	-0.0179694	-0.0179491	-0.0179049	-0.017861	-0.0178034	-0.0176291	-0.0173745	-0.0171307	-0.0168703	-0.0165793	-0.0162773	-0.0159858	-0.0156784	-0.0153672	-0.0150319	-0.0146602	-0.0142813	-0.0138886	-0.0134517	-0.0129599	-0.0124428	-0.0119623	-0.0115513	-0.0111945	-0.0109158	-0.01069	-0.0104663	-0.0102525	-0.0100657	-0.00992797	-0.00982737	-0.00970852	-0.00958188	-0.00950262	-0.00945174	-0.00940255
-0.0229755	-0.0229681	-0.0229674	-0.0229682	-0.0229777	-0.0229728	-0.0229544	-0.0229562	-0.0229579	-0.0229477	-0.0229585	-0.0229968	-0.023052	-0.02312	-0.0231906	-0.0232551	-0.0233086	-0.0233572	-0.0234471	-0.0235709	-0.0236967	-0.0238228	-0.0239298	-0.0240177	-0.0241183	-0.0242359	-0.0242834	-0.0242745	-0.0242431	-0.0242033	-0.0241787	-0.0241964	-0.0242785	-0.0243762	-0.0244676	-0.024554	-0.0246261	-0.0246685	-0.0246644	-0.0247061	-0.0248456	-0.0249968	-0.0252176	-0.0254995	-0.0257841	-0.0261122	-0.026489	-0.0268852	-0.0272597	-0.0276061
0.112467	0.113089	0.113718	0.114292	0.115086	0.116211	0.117342	0.118229	0.118818	0.119134	0.119313	0.119493	0.119748	0.120022	0.120772	0.122012	0.123007	0.123117	0.12229	0.121144	0.119806	0.11824	0.116597	0.114555	0.112142	0.109838	0.107697	0.105705	0.103844	0.102107	0.100353	0.0986259	0.0969055	0.0951589	0.093506	0.0919617	0.09049	0.0891037	0.0878023	0.0866576	0.0856559	0.0847884	0.0837996	0.0825134	0.0811968	0.0799072	0.0786536	0.0772518	0.0757185	0.0742484
0.00361811	0.00359795	0.00357805	0.00355025	0.00352277	0.00350397	0.00349454	0.00348079	0.00345168	0.00341532	0.00338298	0.00334936	0.00330661	0.00326204	0.00322977	0.00321826	0.00321168	0.00318456	0.00313702	0.00309881	0.00307023	0.0030181	0.00295348	0.00287898	0.00278696	0.00268741	0.00260613	0.00255305	0.00250718	0.00246985	0.002431	0.00238621	0.00234402	0.00230413	0.00226728	0.00222899	0.00219018	0.00215369	0.00212568	0.00210358	0.00208402	0.00207248	0.00205267	0.00202677	0.00200174	0.00199125	0.00200329	0.00202628	0.00203992	0.00204002
0.00959307	0.00959967	0.00960613	0.00961202	0.00961866	0.00962503	0.0096292	0.00963218	0.00963525	0.00963799	0.00964015	0.00964262	0.00964317	0.00964127	0.00964235	0.00964598	0.00964618	0.00963884	0.00962553	0.00960948	0.00959174	0.00957334	0.00955534	0.00953559	0.00951287	0.00949224	0.00947394	0.00945585	0.00943928	0.00942389	0.00940895	0.0093953	0.00938293	0.00937168	0.00936161	0.00935344	0.0093464	0.00934024	0.00933467	0.00932969	0.00932487	0.00931882	0.0093107	0.00930126	0.00929285	0.00928402	0.00927414	0.0092624	0.00924967	0.00923811
[truncated: 5,000 more columns]

## Sheet: Figure_6C
6C inequality term, rows are participants, means and SEM last 2 rows
-0.0748666	-0.0745124	-0.0741596	-0.0738055	-0.0734532	-0.073102	-0.0727617	-0.0724509	-0.0721601	-0.071879	-0.0716168	-0.071373	-0.0711312	-0.0708862	-0.0706422	-0.0704038	-0.0701744	-0.0699551	-0.0697486	-0.069558	-0.0693902	-0.0692474	-0.0691266	-0.0690226	-0.0689293	-0.0688427	-0.0687612	-0.0686894	-0.0686398	-0.0686155	-0.0686012	-0.0685903	-0.0685851	-0.0685837	-0.0685883	-0.0686027	-0.0686337	-0.0686838	-0.0687447	-0.0688067	-0.0688643	-0.0689271	-0.0690062	-0.069095	-0.0691843	-0.0692728	-0.069363	-0.0694522	-0.0695376	-0.0696236
-0.041625	-0.0415044	-0.0413805	-0.0412537	-0.0411205	-0.040986	-0.0408704	-0.0407567	-0.0406327	-0.0405089	-0.0403838	-0.0402556	-0.0402465	-0.0403564	-0.0404261	-0.040438	-0.0404043	-0.0402108	-0.0399026	-0.0396092	-0.0392996	-0.0389763	-0.0386578	-0.0384561	-0.0383808	-0.0382124	-0.0379457	-0.0376922	-0.0374339	-0.0371707	-0.0368904	-0.0365886	-0.0362889	-0.0359742	-0.0356342	-0.0353	-0.0349882	-0.0346882	-0.034382	-0.0340496	-0.0337067	-0.0333644	-0.0330004	-0.0326107	-0.032207	-0.0318136	-0.0314311	-0.031062	-0.0307101	-0.0303561
-0.0723806	-0.0722211	-0.0719908	-0.0717429	-0.0715936	-0.0715026	-0.0713935	-0.0712639	-0.0711322	-0.0710042	-0.0708849	-0.0707773	-0.0706755	-0.0705797	-0.0704879	-0.0703992	-0.0703213	-0.0702518	-0.0701764	-0.0700903	-0.0700118	-0.0699555	-0.0699151	-0.069878	-0.0698347	-0.069791	-0.0697506	-0.0697036	-0.0696479	-0.0695856	-0.0695124	-0.0694313	-0.0693512	-0.069267	-0.0691769	-0.0690357	-0.0688383	-0.0686348	-0.0684994	-0.068442	-0.0683475	-0.0682272	-0.0681238	-0.0680189	-0.0679219	-0.0679146	-0.0679798	-0.0680356	-0.0680104	-0.0678997
-0.0406847	-0.0403941	-0.0400923	-0.0397894	-0.0394486	-0.039074	-0.0386909	-0.038281	-0.0378603	-0.0374389	-0.0369828	-0.0364844	-0.0359859	-0.0355186	-0.0350483	-0.0345613	-0.0340815	-0.0336101	-0.0331233	-0.0326039	-0.0320099	-0.0313589	-0.0307163	-0.0300943	-0.0294836	-0.0288757	-0.0282706	-0.0276656	-0.027052	-0.0264437	-0.0258656	-0.025291	-0.0246974	-0.0241117	-0.0235346	-0.0229714	-0.0224159	-0.0218362	-0.0212597	-0.0207124	-0.0201982	-0.0197194	-0.0192629	-0.0187924	-0.0182318	-0.0176761	-0.0171942	-0.0167375	-0.0163068	-0.0159176
-0.0203594	-0.0204281	-0.0204974	-0.020546	-0.0205765	-0.0205935	-0.020611	-0.0206325	-0.0206637	-0.0207015	-0.0207293	-0.0207588	-0.0207979	-0.0208364	-0.0208722	-0.0209132	-0.0209682	-0.0210347	-0.0211061	-0.0211796	-0.0212589	-0.0213439	-0.021454	-0.0215774	-0.0216941	-0.0218115	-0.0219232	-0.0220735	-0.0222176	-0.0223309	-0.0224712	-0.0226121	-0.0227573	-0.0229244	-0.0230617	-0.0231649	-0.0232887	-0.0234376	-0.0236007	-0.0237952	-0.0240426	-0.0243214	-0.0246023	-0.0248534	-0.0250839	-0.0253337	-0.0256002	-0.0258772	-0.0261563	-0.0264413
-0.0335409	-0.0339444	-0.0343191	-0.0346634	-0.0350347	-0.0354563	-0.03589	-0.0363344	-0.0367004	-0.0369652	-0.0372573	-0.0375861	-0.03787	-0.0381365	-0.0384251	-0.0387308	-0.0390025	-0.0392326	-0.0394475	-0.0396238	-0.0397376	-0.0398224	-0.0399289	-0.040064	-0.0401777	-0.0402477	-0.0403427	-0.0404923	-0.0406535	-0.04082	-0.0409898	-0.0411912	-0.0414308	-0.0416558	-0.0418932	-0.0421015	-0.0422598	-0.0424047	-0.0425659	-0.0427399	-0.0428859	-0.0430902	-0.0433937	-0.0437517	-0.0441424	-0.044544	-0.0448942	-0.0451783	-0.0454321	-0.0456613
-0.0111258	-0.0114353	-0.0116875	-0.0118968	-0.0120348	-0.0121462	-0.0122489	-0.0124363	-0.0126738	-0.0127859	-0.012795	-0.0128295	-0.0128829	-0.012977	-0.0131395	-0.0132986	-0.0134666	-0.0136537	-0.0138206	-0.0139229	-0.0139954	-0.0140863	-0.014204	-0.0143481	-0.0145114	-0.0147167	-0.0148647	-0.0150044	-0.0152408	-0.015499	-0.0157398	-0.0159686	-0.0162095	-0.0164694	-0.0167803	-0.0171373	-0.0174791	-0.0177923	-0.0181062	-0.0184241	-0.0187477	-0.0191034	-0.0194888	-0.0198506	-0.020153	-0.0204193	-0.0206859	-0.0210184	-0.0213685	-0.0217159
0.00366839	0.0036741	0.00367863	0.00367923	0.00367501	0.00366713	0.0036688	0.00366861	0.00380737	0.00409194	0.0043451	0.00455999	0.00474673	0.00491084	0.00505966	0.00519402	0.00532439	0.00543092	0.0055075	0.00557414	0.00563244	0.00579784	0.00606277	0.00626819	0.00635244	0.00634079	0.00630847	0.00628143	0.00628904	0.00632617	0.0063558	0.00633661	0.00626458	0.00617734	0.00608121	0.00598811	0.00594814	0.00602142	0.00617201	0.00635173	0.00655121	0.00674092	0.00686536	0.00693108	0.00697558	0.00698784	0.00698165	0.00697953	0.0069797	0.00697007
0.0924916	0.0917747	0.0911258	0.0905906	0.0903376	0.0902021	0.0904007	0.0910378	0.0914364	0.0911563	0.0904834	0.0901973	0.0902305	0.0900865	0.089839	0.0896306	0.0894508	0.0892865	0.0890658	0.0889635	0.0890435	0.0891252	0.0892914	0.0896736	0.0900497	0.090304	0.0904047	0.0903285	0.0902507	0.0902155	0.090103	0.0899112	0.0894183	0.08861	0.087833	0.0870923	0.0866639	0.0865631	0.0863644	0.0860396	0.0857562	0.0855367	0.0853422	0.0851496	0.0852667	0.0859245	0.0867887	0.0875957	0.0883548	0.0890346
0.0110824	0.0099253	0.00879015	0.00767656	0.00658627	0.00548126	0.00435966	0.00325073	0.00220154	0.00134317	0.000602118	-9.79869e-05	-0.00071976	-0.00132128	-0.00189615	-0.00275751	-0.00397069	-0.00520689	-0.0064042	-0.00767192	-0.0090812	-0.0106019	-0.012204	-0.0137724	-0.0152024	-0.016519	-0.0177812	-0.0191076	-0.0206988	-0.0224298	-0.0240591	-0.0255734	-0.0269204	-0.0282029	-0.0294977	-0.0307284	-0.0319215	-0.033063	-0.0339819	-0.0347172	-0.0354486	-0.0361512	-0.036803	-0.0374188	-0.0382035	-0.039155	-0.0401598	-0.0411719	-0.0421077	-0.0428772
-0.00155089	-0.00113746	-0.00105564	-0.000968492	-0.000689874	-0.000274761	0.000362858	0.00109499	0.00177429	0.00237475	0.00292575	0.0034745	0.00392859	0.00438099	0.00481766	0.00512276	0.00539116	0.00565005	0.00586697	0.00598318	0.00608332	0.00617196	0.00612255	0.00598628	0.00591287	0.00595684	0.00604733	0.00588543	0.00549451	0.00518632	0.0049997	0.00491955	0.00506163	0.00534141	0.00551199	0.00561777	0.00563295	0.0057397	0.00597767	0.00614869	0.006143	0.00607622	0.00611338	0.00611913	0.00609652	0.0060451	0.00602681	0.0060087	0.00594248	0.00589814
0.0161566	0.0160302	0.0159066	0.0157875	0.0156697	0.01556	0.0154747	0.015403	0.0153209	0.0152271	0.0151329	0.0150356	0.0149223	0.0148005	0.0146829	0.0145655	0.0144224	0.0142584	0.0141119	0.0139824	0.0138468	0.0137099	0.0135822	0.0134594	0.0133432	0.0132352	0.0131327	0.0130351	0.0129357	0.0128299	0.0127152	0.0125906	0.0124623	0.0123382	0.0122158	0.0120887	0.0119618	0.0118372	0.0117066	0.0115735	0.0114442	0.0113142	0.0111816	0.0110408	0.010888	0.0107346	0.0105881	0.0104379	0.0102764	0.0101087
-0.0617381	-0.061878	-0.0621834	-0.0624632	-0.0625337	-0.0623986	-0.0622478	-0.0620963	-0.0619502	-0.0618012	-0.061898	-0.0622274	-0.0623352	-0.0624121	-0.0624746	-0.0625371	-0.062778	-0.0628138	-0.0626543	-0.0626793	-0.0628754	-0.0628658	-0.0626621	-0.0624557	-0.0622156	-0.0619503	-0.0616911	-0.0614297	-0.0612295	-0.0609564	-0.0607159	-0.0606392	-0.0605556	-0.0604639	-0.0603574	-0.0601096	-0.0597392	-0.0593847	-0.0590358	-0.058812	-0.0587126	-0.0586058	-0.0584276	-0.0582373	-0.0579263	-0.0574551	-0.0570004	-0.0565576	-0.0561301	-0.0557123
0.037694	0.0376042	0.0375304	0.0374779	0.0374549	0.037456	0.0374831	0.0375208	0.0375553	0.0375972	0.0376585	0.0377307	0.0378173	0.037919	0.0380099	0.0380983	0.0381967	0.0383048	0.0384364	0.0385908	0.038748	0.0389153	0.0390976	0.0393258	0.0395962	0.0398654	0.0401485	0.0404482	0.0407568	0.0410707	0.0413883	0.0417161	0.0420682	0.0424308	0.0427575	0.0430558	0.0433438	0.0436268	0.0439237	0.0442306	0.0445581	0.0449036	0.0452568	0.0456117	0.0458916	0.0461059	0.0463404	0.0466202	0.0469335	0.0472278
0.0564305	0.0568203	0.0571966	0.057524	0.0578385	0.0582223	0.0586625	0.0591109	0.0595638	0.0600083	0.0604148	0.0608106	0.061255	0.0617382	0.0621687	0.0624657	0.0626971	0.0629335	0.0631707	0.0633932	0.0635679	0.0637407	0.0639805	0.0642569	0.0645141	0.0647441	0.0649498	0.0651022	0.065241	0.0654384	0.0656778	0.065893	0.0660778	0.0662731	0.0664744	0.0666554	0.0668147	0.0669267	0.0669918	0.0670546	0.0671435	0.0672758	0.0674384	0.067636	0.0678398	0.0680005	0.0681048	0.068196	0.0682973	0.0683999
-0.00468231	-0.00479563	-0.00490886	-0.00503655	-0.00516708	-0.00529174	-0.00535055	-0.00534371	-0.00530707	-0.00524404	-0.00516796	-0.00504251	-0.00487348	-0.00466488	-0.00443599	-0.00421136	-0.00399675	-0.0037584	-0.0034687	-0.003216	-0.00302603	-0.00284699	-0.00266934	-0.00251402	-0.00238074	-0.00225078	-0.00208218	-0.00184177	-0.00158112	-0.00139717	-0.00126639	-0.00112589	-0.00100909	-0.000867382	-0.000677991	-0.000486846	-0.000297797	-0.00012299	4.12681e-05	0.000207512	0.000367876	0.000513122	0.000668075	0.000835125	0.000997769	0.00114281	0.00120049	0.00118878	0.00117901	0.00115301
0.0345004	0.0340558	0.0336123	0.0331615	0.032714	0.0322248	0.0316743	0.0310588	0.0304121	0.0297945	0.0292031	0.0286442	0.0281142	0.0276046	0.0271301	0.0266709	0.0262262	0.0258433	0.0255163	0.0250982	0.024595	0.024118	0.0236506	0.0232142	0.02282	0.0224599	0.0221274	0.0218071	0.0214883	0.0212008	0.0209935	0.020832	0.0206611	0.0204872	0.0203323	0.0201864	0.020106	0.0201308	0.0202231	0.0203769	0.020567	0.0208211	0.0211464	0.0214832	0.0217939	0.022121	0.0224798	0.022839	0.023213	0.0236068
-0.0449285	-0.0446278	-0.0443609	-0.0441412	-0.0439527	-0.0437772	-0.0436197	-0.0434361	-0.043247	-0.0430334	-0.04279	-0.0425802	-0.0423794	-0.0421741	-0.041913	-0.0416257	-0.0413779	-0.041133	-0.0409011	-0.0407303	-0.0407901	-0.0410351	-0.0412583	-0.0414406	-0.0416823	-0.0420988	-0.0426045	-0.0431033	-0.043597	-0.0440121	-0.0444243	-0.0448999	-0.0454511	-0.0460493	-0.0465862	-0.0470973	-0.0476125	-0.0481353	-0.0486481	-0.0491512	-0.0496344	-0.0500539	-0.0504693	-0.0507566	-0.0507488	-0.0506378	-0.0507489	-0.0512373	-0.051756	-0.0521063
-0.0188897	-0.0189639	-0.0190218	-0.0190626	-0.0190959	-0.0191339	-0.0191783	-0.0192159	-0.0192397	-0.0192501	-0.01925	-0.0192388	-0.0192271	-0.0192353	-0.019254	-0.0192641	-0.0192706	-0.0192855	-0.0193203	-0.0193691	-0.0194234	-0.0194934	-0.0195806	-0.0196854	-0.0198075	-0.0199378	-0.0200822	-0.020245	-0.0204252	-0.0206151	-0.0208087	-0.020897	-0.0208921	-0.0209062	-0.0209176	-0.0209248	-0.0209307	-0.0209472	-0.0209722	-0.0209927	-0.0210279	-0.0210714	-0.0211	-0.0211154	-0.0211243	-0.0211409	-0.0211783	-0.0212102	-0.0212159	-0.0212178
-0.00599321	-0.00590059	-0.00583212	-0.00581644	-0.00583897	-0.00585541	-0.00586774	-0.00588342	-0.00588401	-0.00588572	-0.00593686	-0.0060219	-0.00608219	-0.00611137	-0.00614719	-0.00616968	-0.00617659	-0.0062119	-0.00627503	-0.00634199	-0.0064123	-0.00653658	-0.00670435	-0.00687834	-0.00705073	-0.0072096	-0.00736739	-0.00753692	-0.00770945	-0.00787096	-0.00802244	-0.00816544	-0.00830539	-0.00846033	-0.00864703	-0.00884769	-0.00904348	-0.00921736	-0.00938252	-0.00956057	-0.00973852	-0.00990502	-0.0100526	-0.0101878	-0.0102918	-0.0103781	-0.010485	-0.0106056	-0.010726	-0.0108432
-0.0287806	-0.0286037	-0.028791	-0.0291857	-0.029468	-0.0296373	-0.0296833	-0.0296165	-0.0295291	-0.0295039	-0.0295586	-0.029388	-0.0289118	-0.0284349	-0.0280167	-0.0277056	-0.0272296	-0.0265108	-0.0258507	-0.025294	-0.0248259	-0.024452	-0.0244313	-0.0246795	-0.0248583	-0.0249301	-0.0249375	-0.0250509	-0.025367	-0.0258935	-0.0263072	-0.0267724	-0.0275186	-0.0282863	-0.0288462	-0.0292123	-0.0294097	-0.0292161	-0.0286557	-0.028472	-0.0287172	-0.0287319	-0.0285298	-0.0285459	-0.02891	-0.0293735	-0.0299792	-0.0307193	-0.0312612	-0.0315235
0.0468579	0.0466334	0.0464445	0.0461228	0.0456959	0.0452597	0.0447791	0.0442964	0.0438161	0.0433431	0.0429014	0.0425004	0.0421314	0.0418258	0.0416015	0.0413753	0.0410881	0.0407834	0.0404867	0.0401895	0.0398868	0.0396116	0.039398	0.0391753	0.0388936	0.0386005	0.0383179	0.0380576	0.0378536	0.0377047	0.037578	0.0376035	0.0377609	0.0378424	0.03786	0.037874	0.0379054	0.037958	0.0379946	0.0380527	0.0381492	0.0382386	0.0383253	0.0384172	0.0385074	0.0385762	0.0386233	0.0386535	0.0386735	0.0386975
0.0875894	0.0868279	0.0860658	0.0853048	0.0847408	0.0843562	0.0839506	0.0835191	0.0830829	0.0826635	0.0822503	0.0818222	0.0813833	0.0809403	0.0805189	0.0800707	0.0795515	0.0789522	0.0783021	0.0777118	0.0771899	0.0766925	0.0761986	0.0756909	0.0751844	0.0746929	0.0741859	0.0736392	0.0729467	0.0721423	0.0713332	0.0704964	0.0696499	0.0688258	0.0680367	0.0672611	0.0664869	0.0657273	0.0650057	0.0643048	0.063542	0.0627318	0.0619481	0.0611993	0.0604802	0.0598479	0.0593004	0.0587517	0.0581842	0.0574828
0.062085	0.0621106	0.0621164	0.062129	0.0621433	0.0621622	0.0621893	0.0622087	0.0622284	0.0622608	0.0623057	0.0623558	0.0624051	0.0624455	0.0624674	0.0624423	0.0623889	0.0623504	0.0623444	0.0623567	0.0623672	0.0623879	0.0623851	0.0623492	0.062321	0.0623228	0.0623567	0.0623928	0.0624079	0.0624168	0.0624088	0.062385	0.0623934	0.0624267	0.0624459	0.0624222	0.0623638	0.0623457	0.0624084	0.0624887	0.0625768	0.0627245	0.0629292	0.063109	0.0632122	0.0632607	0.0633205	0.0634201	0.0635171	0.0636019
-0.00135839	-0.00131809	-0.00128106	-0.00125173	-0.00122014	-0.00117897	-0.00113246	-0.00108698	-0.00104729	-0.00101436	-0.000985685	-0.000957655	-0.000926148	-0.000894722	-0.000869182	-0.000846368	-0.000820323	-0.000790726	-0.000761625	-0.000735184	-0.000712067	-0.000690352	-0.000668163	-0.000646746	-0.000625065	-0.000603015	-0.000582524	-0.00056415	-0.000546419	-0.0005257	-0.000502392	-0.000482335	-0.000467455	-0.000453408	-0.000438814	-0.000427128	-0.000418954	-0.000411801	-0.000404012	-0.000396419	-0.000392651	-0.000392135	-0.000392381	-0.000395987	-0.000402803	-0.000411353	-0.000424132	-0.0004427	-0.000466205	-0.00048934
-0.00719039	-0.00733571	-0.00746581	-0.00755715	-0.00764177	-0.00775598	-0.00780037	-0.00776769	-0.00774201	-0.00770496	-0.00772417	-0.0077577	-0.0077594	-0.00777907	-0.00778994	-0.00779824	-0.00781221	-0.0078352	-0.00794274	-0.00811708	-0.00825741	-0.00846395	-0.00871598	-0.00892482	-0.00908723	-0.00920376	-0.00936622	-0.00956196	-0.00970586	-0.00983167	-0.00998719	-0.0101599	-0.010329	-0.0104876	-0.0106553	-0.0108292	-0.0110309	-0.0112843	-0.0115576	-0.0118209	-0.0120491	-0.0122387	-0.0124188	-0.0126722	-0.0129687	-0.0132229	-0.0134237	-0.0135849	-0.0137305	-0.0139793
0.0821274	0.0824817	0.082839	0.0831577	0.0834111	0.0837051	0.0840199	0.0845554	0.08539	0.086267	0.0871064	0.08787	0.0886386	0.0894211	0.0900744	0.0906974	0.0915343	0.0924754	0.0932873	0.0940686	0.0947923	0.0955841	0.0965167	0.0973403	0.0981026	0.0984153	0.098502	0.0987642	0.0989362	0.0990943	0.0992771	0.0993128	0.0992272	0.0991772	0.0992462	0.0992662	0.0991318	0.0990224	0.0991034	0.0993208	0.0994876	0.0995843	0.0996615	0.0998164	0.10005	0.100305	0.100549	0.100871	0.10127	0.101598
0.0317617	0.0315553	0.0313786	0.0312321	0.0310945	0.0309607	0.0308505	0.0307808	0.0307481	0.0307185	0.0306888	0.0307908	0.031004	0.0311928	0.0313581	0.0316476	0.0319208	0.0320308	0.0321209	0.0322134	0.0323079	0.0323035	0.0322138	0.0321473	0.0320791	0.032009	0.0319612	0.0319305	0.0319033	0.0318629	0.0318513	0.0318757	0.0318961	0.0319133	0.0319305	0.0319527	0.0319959	0.0320445	0.0320862	0.0321473	0.032236	0.0323468	0.0324389	0.0325093	0.0326424	0.0328516	0.0330967	0.0334335	0.0338405	0.0342313
0.0197872	0.0198398	0.0198953	0.0199637	0.0200494	0.0201294	0.0201942	0.020261	0.0203392	0.0204538	0.0206051	0.0207678	0.0209357	0.0210748	0.0211885	0.0213344	0.0215074	0.0216741	0.0218201	0.0219629	0.0221158	0.0222659	0.022427	0.0226086	0.0227866	0.022929	0.0230398	0.0231393	0.0232311	0.0233116	0.0233745	0.0234157	0.0234408	0.0234446	0.0234908	0.0235822	0.0236523	0.0237061	0.0237433	0.0237428	0.0237333	0.0237419	0.0237381	0.0237131	0.0236738	0.0236302	0.0235787	0.0235281	0.0234736	0.0234035
0.00469283	0.0047248	0.00478756	0.00477209	0.0047636	0.00477501	0.0048343	0.0049704	0.00512459	0.00526645	0.00541978	0.00559296	0.00577846	0.00598444	0.0062021	0.00641622	0.00662645	0.00681035	0.00700909	0.0072481	0.00753837	0.00787769	0.00820433	0.00850903	0.00882083	0.00915298	0.00945028	0.00972706	0.0100116	0.0102865	0.0105699	0.0108876	0.0112345	0.0115789	0.0119214	0.0122724	0.0125894	0.0129645	0.0134242	0.0139138	0.0144331	0.0149228	0.0153645	0.0157631	0.016116	0.0165345	0.0169664	0.0173533	0.0176751	0.0179211
0.0355199	0.035758	0.0360367	0.0362946	0.0365513	0.0365507	0.0362425	0.0358348	0.035384	0.0350082	0.0346802	0.0343527	0.0339735	0.0335587	0.033153	0.0332207	0.0337697	0.0344608	0.0352856	0.0362118	0.0372127	0.0380148	0.0386327	0.0391779	0.0395219	0.0397192	0.0396818	0.0394007	0.0391334	0.0388906	0.0386822	0.0384281	0.0380856	0.0376949	0.0372817	0.0368937	0.036454	0.0359572	0.0355641	0.0352774	0.0349893	0.0346897	0.0342829	0.0338661	0.0334962	0.0330381	0.0325286	0.0320035	0.0314676	0.0309205
-0.0392753	-0.0391742	-0.0390758	-0.0389824	-0.0388921	-0.0388018	-0.0387132	-0.0386284	-0.0385452	-0.0384612	-0.0383786	-0.0382984	-0.038221	-0.0381417	-0.0380584	-0.0379778	-0.0379015	-0.0378243	-0.0377449	-0.0376653	-0.0375895	-0.0375155	-0.0374372	-0.0373576	-0.0372832	-0.0372171	-0.037155	-0.0370907	-0.0370233	-0.0369547	-0.0368861	-0.0368195	-0.0367578	-0.0366996	-0.0366397	-0.0365765	-0.0365134	-0.0364523	-0.0363911	-0.0363297	-0.0362689	-0.0362088	-0.0361501	-0.0360925	-0.0360341	-0.0359786	-0.0359284	-0.0358779	-0.0358248	-0.0357713
-0.0150467	-0.0150286	-0.0150088	-0.0149863	-0.0149561	-0.0149207	-0.0148917	-0.0148702	-0.0148484	-0.0148223	-0.0147923	-0.0147628	-0.0147396	-0.0147172	-0.0146904	-0.0146629	-0.014672	-0.0147181	-0.0147599	-0.0147972	-0.0148442	-0.0149003	-0.0149548	-0.0150104	-0.015051	-0.015066	-0.0150863	-0.0151258	-0.0151823	-0.0152394	-0.0152949	-0.0153603	-0.0154286	-0.0154959	-0.0155641	-0.0156413	-0.0157257	-0.0158162	-0.0159139	-0.0160121	-0.0161064	-0.0161973	-0.0162811	-0.0163625	-0.016448	-0.0165286	-0.0165921	-0.0166413	-0.0166802	-0.0167075
0.0459572	0.0454121	0.0448924	0.0443637	0.0438211	0.0433224	0.0428683	0.0423966	0.0418041	0.041139	0.0405292	0.039956	0.0394511	0.0390765	0.0387875	0.0385047	0.0382336	0.0379441	0.0376882	0.0375234	0.0374358	0.0373631	0.0372657	0.0371846	0.0370995	0.0369985	0.0368365	0.0366295	0.0364187	0.0362191	0.036023	0.0358929	0.0358594	0.0357944	0.0356748	0.0355887	0.0354773	0.0353196	0.0352226	0.0351619	0.0350973	0.0349925	0.0348584	0.0347872	0.03478	0.0347567	0.0346877	0.034624	0.0346107	0.0346289
0.0296167	0.0297082	0.0298152	0.0298976	0.0299422	0.0299821	0.0300139	0.0300442	0.0300834	0.030132	0.0301846	0.0302332	0.030275	0.0303267	0.0303817	0.0304259	0.0304682	0.0305053	0.0305146	0.0304972	0.030471	0.0304638	0.0304537	0.0304074	0.030348	0.030283	0.0302166	0.0301538	0.0300919	0.0300306	0.0299547	0.0298523	0.0297556	0.0296774	0.0296087	0.0295505	0.0294925	0.0294286	0.0293676	0.0292998	0.0292176	0.0291489	0.0291041	0.0290741	0.0290591	0.029067	0.0290958	0.0290951	0.0290624	0.0290465
-0.0177639	-0.0180204	-0.0182391	-0.0185096	-0.0189547	-0.0193326	-0.0195058	-0.0197186	-0.0198268	-0.0197932	-0.0195785	-0.0191595	-0.0187348	-0.0183484	-0.0179888	-0.0177581	-0.0174115	-0.0168475	-0.0161844	-0.0154879	-0.0148198	-0.0140813	-0.0133203	-0.0126972	-0.0122463	-0.0118361	-0.0113951	-0.0109399	-0.0105408	-0.0102046	-0.00983701	-0.00943653	-0.00931514	-0.0096168	-0.00992841	-0.0101287	-0.010373	-0.0106102	-0.010868	-0.0112459	-0.0117191	-0.0123517	-0.013128	-0.0138958	-0.014492	-0.0148886	-0.0152436	-0.0157341	-0.016375	-0.0169916
-0.071445	-0.0712781	-0.0711033	-0.0709247	-0.0707534	-0.0705838	-0.0704124	-0.0702395	-0.070061	-0.0698802	-0.069704	-0.0695409	-0.0691245	-0.0684449	-0.0677709	-0.0671159	-0.0664869	-0.0658878	-0.0653193	-0.0647647	-0.064209	-0.0636494	-0.0631026	-0.0625858	-0.062087	-0.0615986	-0.0611255	-0.0606729	-0.0602269	-0.0597729	-0.0593273	-0.0588993	-0.0584746	-0.0580588	-0.05766	-0.0572648	-0.0568745	-0.0564811	-0.0560841	-0.0557115	-0.0553569	-0.0549992	-0.0546499	-0.0543123	-0.0539789	-0.053655	-0.0533329	-0.0530141	-0.0527099	-0.0524075
0.0122587	0.0120145	0.0117797	0.0115557	0.0113387	0.011206	0.0111625	0.0111111	0.0110287	0.0109288	0.010829	0.0107113	0.0105635	0.010411	0.0102683	0.010125	0.00997829	0.00983362	0.00969772	0.00956964	0.00944026	0.00930583	0.00916507	0.00901483	0.00886162	0.00870686	0.00853216	0.00834587	0.00818432	0.00803987	0.00787742	0.00770215	0.00751973	0.00732125	0.00712457	0.00694776	0.00677828	0.00660011	0.00643419	0.00629885	0.00616008	0.0059747	0.00575888	0.00556257	0.00540004	0.00523919	0.00505197	0.00483725	0.00460936	0.00441172
-0.053559	-0.0540611	-0.0545085	-0.0549084	-0.0552954	-0.0556822	-0.0560458	-0.056337	-0.0565713	-0.0567884	-0.0569882	-0.0571677	-0.0572784	-0.057313	-0.0573149	-0.0573019	-0.0572551	-0.0572139	-0.057188	-0.0571121	-0.0570476	-0.0570362	-0.057042	-0.0569688	-0.0568103	-0.056628	-0.0564293	-0.0562038	-0.0559522	-0.0557206	-0.0555835	-0.0555255	-0.0554404	-0.0553319	-0.0552244	-0.0551089	-0.0549636	-0.0547936	-0.0546263	-0.0544864	-0.0543573	-0.0542266	-0.0541112	-0.0540572	-0.054062	-0.0540639	-0.0540473	-0.0540047	-0.054014	-0.054084
-0.0883339	-0.0885077	-0.0885149	-0.0883908	-0.0882847	-0.0881876	-0.0881906	-0.0882993	-0.0884003	-0.0886466	-0.0890347	-0.089414	-0.0897771	-0.0900594	-0.0902664	-0.0904294	-0.0905355	-0.090591	-0.090614	-0.0907966	-0.0911513	-0.0914499	-0.0917193	-0.0920082	-0.0923723	-0.0927975	-0.0931922	-0.0935655	-0.0939171	-0.0942435	-0.0945429	-0.0948078	-0.0950486	-0.0951165	-0.0950244	-0.0949524	-0.0949045	-0.0948719	-0.0948359	-0.0947926	-0.0947457	-0.0946394	-0.0945736	-0.0946135	-0.0946706	-0.0949157	-0.0953769	-0.0958335	-0.0962222	-0.0965678
0.0181794	0.0180981	0.0179694	0.0178977	0.0178569	0.0177634	0.0176498	0.0175638	0.0174684	0.0173905	0.017337	0.0172798	0.0172281	0.0172993	0.0173766	0.0173682	0.0173841	0.0173884	0.0173914	0.0175509	0.017851	0.0181603	0.0184766	0.0187976	0.019129	0.0194804	0.019848	0.020214	0.0205589	0.0208616	0.0211511	0.0214716	0.0219012	0.0224508	0.0230374	0.023657	0.0242968	0.0249111	0.0255334	0.0261677	0.0267871	0.0273838	0.0279656	0.0285219	0.0290574	0.0296039	0.0301348	0.0306199	0.0311127	0.0316078
-0.0307404	-0.0311568	-0.0315765	-0.0320169	-0.0324679	-0.0329779	-0.0335441	-0.0340979	-0.0346239	-0.035133	-0.0356514	-0.0361806	-0.0366426	-0.0370392	-0.0374484	-0.0378664	-0.0382825	-0.0386889	-0.039075	-0.0394614	-0.0398602	-0.0402551	-0.0406473	-0.0410101	-0.0413153	-0.0415923	-0.0418594	-0.0421147	-0.0423581	-0.042575	-0.0427871	-0.0430278	-0.0432797	-0.0435305	-0.0437848	-0.0440429	-0.0443007	-0.0445556	-0.0447797	-0.0449882	-0.0452326	-0.0454991	-0.045803	-0.0461127	-0.0464327	-0.0467402	-0.0470034	-0.0472861	-0.0475724	-0.0478507
-0.045253	-0.0440161	-0.0425879	-0.0412205	-0.0399138	-0.0384997	-0.0371195	-0.0359846	-0.0345788	-0.0328015	-0.0308598	-0.0288192	-0.0266364	-0.0244435	-0.0222699	-0.0199944	-0.0182147	-0.0172574	-0.0166761	-0.0159289	-0.0154062	-0.0153835	-0.0154564	-0.0153333	-0.0150157	-0.01443	-0.0136087	-0.012833	-0.012121	-0.0114586	-0.0107014	-0.0100697	-0.00973571	-0.00947329	-0.00925818	-0.00915154	-0.00912551	-0.00897536	-0.00873241	-0.00835792	-0.00780422	-0.00729211	-0.00681976	-0.00617174	-0.00538402	-0.00464796	-0.00426769	-0.00447517	-0.00491161	-0.00524503
-0.00238733	-0.00244639	-0.00250655	-0.0025705	-0.002621	-0.00265499	-0.00267275	-0.0026765	-0.00266642	-0.00264844	-0.00263595	-0.00260545	-0.00253898	-0.00246112	-0.00238511	-0.00231142	-0.00224305	-0.00217692	-0.0021126	-0.00204807	-0.00199788	-0.00196368	-0.00194074	-0.0019261	-0.00191549	-0.00191046	-0.00191064	-0.00193084	-0.00197521	-0.00202415	-0.00206534	-0.00211191	-0.00217468	-0.00224839	-0.00231425	-0.00236955	-0.00241846	-0.00244152	-0.0024358	-0.0024339	-0.00244569	-0.0024571	-0.00246978	-0.00248314	-0.0024832	-0.00247428	-0.00248594	-0.00252793	-0.002571	-0.00260556
0.00686045	0.00684361	0.0068271	0.00681039	0.00679665	0.00678438	0.00677479	0.00677094	0.00676597	0.00675654	0.00674673	0.00674095	0.00673529	0.00672776	0.00671881	0.00671077	0.00670633	0.00670155	0.00669534	0.00669333	0.00669669	0.00670099	0.00670731	0.00671546	0.00672289	0.00672548	0.00672394	0.00672183	0.00671945	0.00671763	0.00671641	0.00671531	0.0067127	0.00670758	0.00670207	0.00669536	0.00668849	0.00668377	0.00668048	0.00668016	0.00668148	0.00668237	0.00668406	0.00668795	0.00669452	0.0067065	0.00672358	0.00674335	0.00676291	0.00677842
[truncated: 5,000 more columns]
